# Supplementary material for: Identification of AMP-activated protein kinase targets by a consensus sequence search of the proteome
Source: PubMed Central journal article supplement (PMC4357066; doi:10.1186/s12918-015-0156-0), 2015-03-11
Supplement: 12918_2015_156_MOESM1_ESM.pdf [file 12918_2015_156_MOESM1_ESM.pdf]

**Additional Table 1: Representative putative AMPK substrates**  
**Data specifics obtained from <http://www.ncbi.nlm.nih.gov/gene>**

| Official Symbol | Official Full Name                                     | Location                                                                                 | Function                                                                                                                                                                                        |
|-----------------|--------------------------------------------------------|------------------------------------------------------------------------------------------|-------------------------------------------------------------------------------------------------------------------------------------------------------------------------------------------------|
| A2M             | alpha-2-macroglobulin                                  | extracellular space                                                                      | response to nutrient; response to glucocorticoid stimulus; response to carbon dioxide; negative regulation of complement activation, lectin pathway                                             |
| ABCA1           | ATP-binding cassette, sub-family A (ABC1), member 1    | cell/plasma membrane; Golgi apparatus; Golgi apparatus                                   | lysosome organization; negative regulation of macrophage derived foam cell differentiation; phagocytosis, engulfment; positive regulation of cAMP                                               |
| ABCB1           | ATP-binding cassette, sub-family B (MDR/TAP), member 1 | cell membrane                                                                            | ion transmembrane transport                                                                                                                                                                     |
| ACACA           | acetyl-CoA carboxylase alpha                           | cytoplasm; nucleus                                                                       | lipid metabolism; fatty acid synthesis; acetyl-CoA metabolic process                                                                                                                            |
| ACADS           | acyl-CoA dehydrogenase, C-2 to C-3 short chain         | mitochondrion                                                                            | response to starvation; oxidation reduction; response to glucocorticoid stimulus; lipid metabolism; fatty acid metabolic process; fatty acid beta oxidation                                     |
| ACIN1           | apoptotic chromatin condensation inducer 1             | cytoplasm; nucleus                                                                       | apoptosis; positive regulation of ; monocyte differentiation; apoptotic chromosome condensation; erythrocyte differentiation                                                                    |
| ACOT7           | acyl-CoA thioesterase 7                                | cytoplasm; mitochondrion                                                                 | fatty acid catabolic process; lipid metabolic process                                                                                                                                           |
| ACOT8           | acyl-CoA thioesterase 8                                | mitochondrion; peroxisome                                                                | fatty acid beta-oxidation using acyl-CoA oxidase; lipid metabolic process; peroxisome organization                                                                                              |
| ACSL3           | acyl-CoA synthetase long-chain family member 3         | endoplasmic reticulum; membrane; microsomes; mitochondrial membrane; nucleus; peroxisome | fatty acid biosynthetic process                                                                                                                                                                 |
| ACTA2           | actin, alpha 2, smooth muscle, aorta                   | cytoplasm; cytoskeleton                                                                  | virus integration/response to virus; lipid metabolic process                                                                                                                                    |
| ACTC1           | actin, alpha, cardiac muscle 1                         | actin; cytoplasm; cytoskeleton                                                           | actomyosin structure organization; response to ethanol; apoptosis                                                                                                                               |
| ACTL6A          | actin-like 6a                                          | nucleus; plasma membrane                                                                 | chromatin remodeling; transcription; Histone H2A and H4 acetylation; regulation of growth; signal transduction                                                                                  |
| ACTN1           | actinin, alpha 1                                       | cytoskeleton; cytoplasm; myofibril; nucleus; sarcomere; Z-disk                           | regulation of apoptosis; focal adhesion assembly; negative regulation of cellular component movement                                                                                            |
| ACTN4           | actinin, alpha 4                                       | actin cytoskeleton; cytoplasm; nucleus                                                   | actin filament bundle assembly; positive regulation of pinocytosis; positive regulation of sodium:hydrogen antiporter activity; protein transport; regulation of apoptosis; response to hypoxia |
| ADD1            | adducin 1 (alpha)                                      | cytosol; membrane; nucleus                                                               | actin cytoskeleton organization; actin filament bundle assembly; barbed-end actin filament capping                                                                                              |
| ADNP            | activity-dependent neuroprotector homeobox             | axon; cytoplasm; dendrite; extracellular space; neuronal cell body; nucleus              | negative regulation of gene expression; negative regulation of neuron apoptosis; negative regulation of synaptic transmission                                                                   |

|          |                                                                         |                                                                                                                   |                                                                                                                                                                                                                                       |
|----------|-------------------------------------------------------------------------|-------------------------------------------------------------------------------------------------------------------|---------------------------------------------------------------------------------------------------------------------------------------------------------------------------------------------------------------------------------------|
| AHNAK    | AHNAK nucleoprotein                                                     | actin cytoskeleton; cell-cell contact zone; costamer; cytoplasm; lysosomal membrane; nucleus; sarcolemma; vesicle | S100 protein binding; poly (A) RNA binding; structural molecular activity conferring elasticity                                                                                                                                       |
| AIFM1    | apoptosis-inducing factor, mitochondrion-associated, 1                  | cytoplasm; microsome; mitochondrion; nucleus                                                                      | DNA damage response, signal transduction resulting in induction of apoptosis/DNA fragmentation involved in apoptotic nuclear change/neuron apoptosis                                                                                  |
| AIMP1    | aminoacyl tRNA synthetase complex-interacting multifunctional protein 1 | cytoplasm;extracellular space; endoplasmic reticulum; gogli apparatus; nucleus                                    | angiogenesis; apoptosis; carbohydrate metabolic process; cell adhesion; cell - cell signaling; glucose metabolic process; inflammatory response                                                                                       |
| AIP      | aryl hydrocarbon receptor interacting protein                           | cytoplasm                                                                                                         | xenobiotic metabolic process; protein maturation by protein folding                                                                                                                                                                   |
| AKR1B10  | aldo-keto reductase family 1, member B10 (aldose reductase)             | cytoplasm                                                                                                         | oxidation reduction; cellular aldehyde metabolic process; steroid metabolic process                                                                                                                                                   |
| AKT2     | v-akt murine thymoma viral oncogene homolog 2                           | mitochondrion; nucleus; plasma membrane                                                                           | regulation of JNK cascade; positive regulation of gene expression; glucose metabolic process; positive regulation of positive chemotaxis                                                                                              |
| ALDH18A1 | aldehyde dehydrogenase 18 family, member A1                             | cytoplasm; mtochondrion inner membrane                                                                            | oxidation reduction; proline biosynthetic process                                                                                                                                                                                     |
| ALDH7A1  | aldehyde dehydrogenase 7 family, member A1                              | cytoplasm; mitochondria; nucleus                                                                                  | cellular aldehyde metabolic process; oxidation reduction; sensory perception of sound                                                                                                                                                 |
| AMPD1    | adenosine monophosphate deaminase 1                                     | undefiend                                                                                                         | nucleotide metabolic process; purine base metabolic process/purine ribonucleoside monophosphate biosynthetic process; extracellular matrix organization                                                                               |
| ANAPC1   | anaphase promoting complex subunit 1                                    | cytoplasm; nucleus; plasma membrane                                                                               | cellular component movement; anaphase-promoting complex-dependent proteasomal ubiquitin-dependent protein catabolic process; cell cycle                                                                                               |
| APBB2    | amyloid beta (A4) precursor protein-binding, family B, member 2         | nucelus                                                                                                           | cell cycle arrest; regulation of transcription; negative regulation of cell growth; negative regulation of S phase of mitotic cell cycle                                                                                              |
| APBB3    | amyloid beta (A4) precursor protein-binding, family B, member 3         | actin cytoskeleton; cytoplasm                                                                                     | beta-amyloid binding; protien binding; trascription factor binding                                                                                                                                                                    |
| APEX1    | APEX nuclease (multifunctional DNA repair enzyme) 1                     | cytoplasm; endoplasmic reticulum; nucleus                                                                         | cell redox homeostasis; transcription from RNA polymerase II promoter; base-excision repair                                                                                                                                           |
| APOA1BP  | apolipoprotein A-I binding protein                                      | extracellular space; mitochondrion                                                                                | NADHX epimerase activity; metal ion binding; nucleotide binding; protein binding; protein homodimerization activity                                                                                                                   |
| APRT     | adenine phosphoribosyltransferase                                       | cytoplasm                                                                                                         | purine ribonucleoside salvage; adenine metabolic process; adenine salvage; nucleoside metabolic process                                                                                                                               |
| ARHGAP5  | rho GTPase activating protein 5                                         | cytoplasm; membrane                                                                                               | signal transduction; cell adhesion; small GTPase mediated signal transduction; Rho protein signal transduction; positive regulation of cell migration; positive regulation of mesenchymal cell proliferation; regulation of cell size |
| ARHGEF1  | rho guanine nucleotide exchange factor (GEF) 1                          | cytoplasm; plasma membrane                                                                                        | Rho protein signal transduction; Cell proliferation; negative regulation of axonogenesis; positive regulation of axonogenesis                                                                                                         |

|        |                                                          |                                                                            |                                                                                                                                                                          |
|--------|----------------------------------------------------------|----------------------------------------------------------------------------|--------------------------------------------------------------------------------------------------------------------------------------------------------------------------|
| ARL2   | ADP-ribosylation factor-like 2                           | cytoplasm; goli apparatus                                                  | cell cycle; small GTPase mediated signal transduction; tubulin complex assembly; acetylcholine transport                                                                 |
| ARRB1  | arrestin, beta 1                                         | cytoplasm; chromatin; cytoplasmic membrane -bounded vesicle; nucleus       | G-protein coupled receptor internalization; cellular membrane organization; histone H4 acetylation                                                                       |
| ASCC3  | activating signal cointegrator 1 complex subunit 3       | cytoplasm                                                                  | transcription                                                                                                                                                            |
| ATG5   | ATG5 autophagy related 5 homolog (S. cerevisiae)         | cytoplasm                                                                  | negative regulation of apoptosis; negative regulation of protein ubiquitination; autophagic vacuole assembly; autophagy                                                  |
| ATP1B1 | ATPase, Na+/K+ transporting, beta 1 polypeptide          | plasma membrane                                                            | potassium ion transport; response to hypoxia; sodium ion transport; ATP biosynthetic process                                                                             |
| ATP2A2 | ATPase, Ca++ transporting, cardiac muscle, slow twitch 2 | endoplasmic reticulum; microsome; nucleus; sarcoplasmic reticulum membrane | ATP biosynthetic process; cation transport; calcium ion homeostasis; cell adhesion; ER-nucleus signaling pathway                                                         |
| ATP2A3 | ATPase, Ca++ transporting, ubiquitous                    | endoplasmic reticulum; nucleus; sarcoplasmic reticulum membrane            | calcium ion transport; cation transport; ATP biosynthetic process                                                                                                        |
| ATRX   | alpha thalassemia/mental retardation syndrome X-linked   | chromatin; nucleus                                                         | DNA methylation; DNA recombination; transcription                                                                                                                        |
| ATXN2  | ataxin-2                                                 | cytoplasm; golgi apparatus                                                 | RNA transport; cell death; regulation of translation; cytoplasmic mRNA processing body assembly                                                                          |
| AVIL   | advillin                                                 | cytoplasm; cytoskeleton                                                    | response to stress ; cytoskeleton organization                                                                                                                           |
| BAG1   | BCL2-associated athanogene                               | cytoplasm; nucleus                                                         | apoptosis; cell surface receptor linked signaling pathway; chaperone cofactor-dependent protein refolding; anti-apoptosis                                                |
| BAI1   | brain-specific angiogenesis inhibitor 1                  | cell plasma membrane                                                       | axonogenesis; cell adhesion; negative regulation of cell proliferation; signal transduction; G-protein coupled receptor protein signaling pathway                        |
| BAK1   | BCL2-antagonist/killer 1                                 | cytoplasm; mitochondrion outer membranee                                   | regulation of apoptosis; establishment or maintenance of transmembrane electrochemical gradient                                                                          |
| BANF1  | barrier to autointegration factor 1                      | cytoplasm; nucleus                                                         | virus integration/response to virus                                                                                                                                      |
| BAT2   | HLA-B associated transcript 2                            | cytoplasm; nucleus                                                         | inflammation                                                                                                                                                             |
| BAZ1B  | bromodomain adjacent to zinc finger domain protein 1B    | nucleus                                                                    | DNA ligation or repair or damage response; Histone modification/phosphorylation; nucleosome assembly (on/off); transcription; regulation of gene expression/epigenetics  |
| BBS2   | Bardet-Biedl syndrome 2                                  | cell projection; cytoplasm; plasma membrane                                | fat cell differentiation; photoreceptor cell maintenance; protein localization; regulation of cilium beat frequency involved in ciliary motility; sperm axoneme assembly |

|        |                                                      |                                                                                                                          |                                                                                                                                                                                             |
|--------|------------------------------------------------------|--------------------------------------------------------------------------------------------------------------------------|---------------------------------------------------------------------------------------------------------------------------------------------------------------------------------------------|
| BCL11A | B-cell CLL/lymphoma 11A (zinc finger protein)        | cytoplasm; nucleus                                                                                                       | hemopoiesis; protein sumoylation; regulation of transcription                                                                                                                               |
| BCL9   | B-cell CLL/lymphoma 9                                | nucleolus; nucleus                                                                                                       | regulation of canonical Wnt receptor signaling pathway                                                                                                                                      |
| BCLAF1 | BCL2-associated transcription factor 1               | nucleus; cytoplasm                                                                                                       | induction of apoptosis; negative regulation of transcription; positive regulation of apoptosis                                                                                              |
| BGN    | biglycan                                             | extracellular space and matrix                                                                                           | blood vessel remodeling; peptide cross-linking via chondroitin 4-sulfate glycosaminoglycan                                                                                                  |
| BMS1B  | BMS1 ribosome biogenesis factor                      | nucleolus; nucleus                                                                                                       | ATP binding; poly (A) RNA binding                                                                                                                                                           |
| BNIP2  | BCL2/adenovirus E1B 19kDa interacting protein 2      | cytoplasm;nuclear membrane/envelope; cell/plasma membrane                                                                | anti-apoptosis                                                                                                                                                                              |
| BRAF   | v-raf murine sarcoma viral oncogene homolog B1       | cytoplasm; synaptosome; cell/plasma membrane; nucleus                                                                    | MAPKKK cascade; negative regulation of neuron apoptosis; positive regulation of ERK1 and ERK2 cascade; protein amino acid phosphorylation                                                   |
| BRD3   | bromodomain containing 3                             | nucleus                                                                                                                  | chromatin binding; lysine-acetylated histone binding; protein binding                                                                                                                       |
| BRD4   | bromodomain containing 4                             | condensed nuclear chromosome; cytoplasm; nucleoplasm; nucleus; positive transcription factor elongation factor complex b | DNA binding; chromatin binding; lysine-acetylated histone binding; p53 binding; protein binding                                                                                             |
| BSG    | basigin                                              | melanosome; embrane                                                                                                      | cell surface receptor linked signaling pathway; decidualization; odontogenesis of dentine-containing tooth; response to cAMP; response to mercury ion; response to peptide hormone stimulus |
| BTF3   | basic transcription factor 3                         | nucleus                                                                                                                  | transcription; transcription from RNA polymerase II promoter                                                                                                                                |
| C3     | complement component 3                               | extracellular space                                                                                                      | inflammatory response; positive regulation of phagocytosis; signal transduction; positive regulation of angiogenesis; immune response                                                       |
| CALR   | calreticulin                                         | cytoplasm; endoplasmic reticulum; extracellular space; microsome; nucleus; plasma membrane                               | cell cycle arrest; cellular calcium ion homeostasis; cortical actin cytoskeleton organization; glucocorticoid receptor signaling pathway                                                    |
| CAMK2G | calcium/calmodulin-dependent protein kinase II gamma | cytosol; endocytic vesicle membrane; membrane; nucleoplasm; sarcoplasmic reticulum membrane                              | ATP binding; calcium-dependent protein serine/threonine phosphatase activity; calmodulin binding                                                                                            |
| CANX   | calnexin                                             | axon; dendrite cytoplasm and spine; endoplasmic reticulum; melanosome; melanosome; neuronal cell body; ribosome          | apolipoprotein binding; calcium ion binding; carbohydrate binding; glycoprotein binding; inotropic glutamate receptor binding; poly (A) RNA binding; unfolded protein binding               |
| CAPN2  | calpain 2, (m/II) large subunit                      | cytoplasm; cell membrane; plasma membrane                                                                                | proteolysis; response to hypoxia; myoblast fusion                                                                                                                                           |
| CARS   | cysteinyI-tRNA synthetase                            | cytoplasm                                                                                                                | cysteinyI-tRNA aminoacylation; translation                                                                                                                                                  |

|          |                                                   |                                                                                          |                                                                                                                                                                 |
|----------|---------------------------------------------------|------------------------------------------------------------------------------------------|-----------------------------------------------------------------------------------------------------------------------------------------------------------------|
| CASP8    | caspase 8, apoptosis-related cysteine peptidase   | cytoplasm;mitochondrion; nucelus                                                         | angiogenesis; apoptosis; macrophage differentiation; positive regulation of I-kappaB kinase/NF-kappaB cascade; protein heterooligomerization                    |
| CAST     | calpastatin                                       | undefined                                                                                | blocks TNF alpha induced NfKappa beta; proteolysis                                                                                                              |
| CAV1     | caveolin 1, caveolae protien                      | caveola; cytoplasm; endoplasmic reticulum; golgi apparatus; plasma membrane              | calcium homeostasis; caveolae formation and stabilization; cholesterol homeostasis; cellular response to starvation                                             |
| CBX5     | chromobox protein homolog 5                       | centrosome; chromatin; cytoplasm; nucleus                                                | chromatin remodeling; Negative regulation of transcription                                                                                                      |
| CCNB1    | cyclin B1                                         | centrosome; cytoplasm; nucleus                                                           | cell division; cellular response to hypoxia; mitotic spindle stabilization; negative regulation of gene expression                                              |
| CCT4     | chaperonin containing TCP1, subunit 4 (delta)     | cytoplasm; melasome                                                                      | protein folding                                                                                                                                                 |
| CCT7     | chaperonin containing TCP1, subunit 7 (eta)       | cytoplasm; mitochondrion                                                                 | Protein folding                                                                                                                                                 |
| CD2BP2   | CD2 (cytoplasmic tail) binding protein 2          | cytoplasm; nucleus; nucleoplasm                                                          | RNA splicing                                                                                                                                                    |
| CDAN1    | congenital dyserythropoietic anemia, type I       | cytoplams; endomembrane system; integral component of membrane; nucleus; plasma membrane | protien binding                                                                                                                                                 |
| CDC37    | cell division cycle 37 homolog                    | cytoplasm                                                                                | regulation of cyclin-dependent protein kinase activity; regulation of interferon-gamma-mediated signaling pathway/ type I interferon-mediated signaling pathway |
| CDC42BPB | Cdc42 binding protein kinase beta                 | cytoplasm; cell/plasma membrane                                                          | signal transduction; phosphorylation                                                                                                                            |
| CDK11    | cyclin-dependent kinase 11A                       | cytoplasm; nucleus                                                                       | apoptosis; regulation of cell growth; regulation of transcription, DNA-dependent; regulation of mRNA processing; mitosis                                        |
| CDK2     | cyclin-dependent kinase 2                         | cytoplasm; nucleus                                                                       | DNA replication; G2/M transition of mitotic cell cycle; Ras protein signal transduction; cell division; Mitosis; positive regulation of cell proliferation      |
| CFDP1    | craniofacial development protein 1                | cytoplasm; nucleus                                                                       | apoptosis(anti); cell adhesion                                                                                                                                  |
| CHD4     | chromodomain helicase DNA binding protein 4       | chromatin; nucleus                                                                       | transcription                                                                                                                                                   |
| CHD5     | chromodomain helicase DNA binding protein 5       | chromatin; nucleus                                                                       | transcription                                                                                                                                                   |
| CHERP    | calcium homeostasis endoplasmic reticulum protein | cytoplasm; cytoskeleton; endoplasmic reticulum                                           | mRNA processing                                                                                                                                                 |

|        |                                                        |                                                                                                                |                                                                                                                            |
|--------|--------------------------------------------------------|----------------------------------------------------------------------------------------------------------------|----------------------------------------------------------------------------------------------------------------------------|
| CHMP1B | charged multivesicular body protein 1B                 | cytosol; extracellular vesicular exosome; late endosome membrane                                               | protein binding; protein domain specific binding                                                                           |
| CIT    | citron (rho-interacting, serine/threonine kinase 21)   | cytoplasm                                                                                                      | cell cycle; cell differentiation; cell division; mitosis; protein amino acid phosphorylation                               |
| CKMT1A | creatine kinase, mitochondrial 1A                      | membrane; mitochondria                                                                                         | creatine metabolic process                                                                                                 |
| CLASP1 | cytoplasmic linker associated protein 1                | centrosome; chromatin; cytoplasm; cytoskeleton; golgi apparatus; kinetochore                                   | cell cycle; cell division; establishment or maintenance of cell polarity; exit from mitosis; microtubule bundle formation  |
| CNN2   | calponin 2                                             | cell to cell junction; cytoskeleton                                                                            | cytoskeleton organization; regulation of actin filament-based process; actomyosin structure organization                   |
| COPB1  | coatamer protein complex, subunit beta 1               | cytoplasm; golgi apparatus membrane; peripheral membrane protein                                               | intracellular protein transport; vesicle-mediated transport; COPI coating of Golgi vesicle; cellular membrane organization |
| COPS2  | COP9 constitutive photomorphogenic homolog subunit 2   | cytoplasm; nucleus                                                                                             | signal transduction; transcription from RNA polymerase II promoter                                                         |
| CORO1B | coronin, actin binding protein, 1B                     | actin cytoskeleton; actin filament; cell leading edge; cytoplasm; lamellipodium; plasma membrane; stress fiber | Arp2/3 complex binding; actin filament binding                                                                             |
| CORO1C | coronin, actin binding protein, 1C                     | actin cytoskeleton                                                                                             | phagocytosis; signal transduction                                                                                          |
| COX    | cytochrome c oxidase                                   | mitochondrion inner membrane                                                                                   | cytochrome-c oxidase activity; electron carrier activity; metal ion binding                                                |
| CPD    | carboxypeptidase D                                     | microsome; nucleus                                                                                             | proteolysis                                                                                                                |
| CPNE2  | copine II                                              | membrane                                                                                                       | calcium-dependent binding                                                                                                  |
| CPOX   | coproporphyrinogen oxidase                             | cytoplasm; mitochondrion intermembrane space                                                                   | oxidation reduction; response to mercury ion; response to arsenic; heme biosynthetic process                               |
| CPSF2  | cleavage and polyadenylation specific factor 2, 100kDa | nucleus                                                                                                        | RNA splicing; histone mRNA 3'-end processing                                                                               |
| CRISP1 | epididymal secretory protein E1                        | extracellular space                                                                                            | fusion of sperm to egg plasma membrane                                                                                     |
| CROT   | carnitine O-octanoyltransferase                        | peroxisome                                                                                                     | fatty acid metabolic process; lipid metabolic process; transport                                                           |
| CRYZL1 | crystallin, zeta (quinone reductase)-like 1            | cytoplasm                                                                                                      | oxidation reduction; quinone cofactor metabolic process                                                                    |

|         |                                                                |                                        |                                                                                                                                                    |
|---------|----------------------------------------------------------------|----------------------------------------|----------------------------------------------------------------------------------------------------------------------------------------------------|
| CTNBL1  | catenin, beta like 1                                           | nucleus                                | positive regulation of apoptosis; somatic diversification of immunoglobulins                                                                       |
| CTNND1  | catenin (cadherin-associated protein), delta 1                 | cytoplasm; nucleus; plasma membrane    | Wnt receptor signaling pathway; cell adhesion; epithelial cell differentiation involved in salivary gland development; regulation of transcription |
| CTTN    | cortactin                                                      | cytoplasm; cytoskeleton; lamellipodium | actin assembly; regulation of endocytosis                                                                                                          |
| CUL3    | cullin 3                                                       | nucleus; Golgi apparatus               | G1/S transition of mitotic cell cycle; cell cycle arrest; cell migration; cyclin catabolic process; protein ubiquitination                         |
| CUL4B   | cullin 4B                                                      | nucleus                                | DNA repair; cell cycle; ubiquitin-dependent protein catabolic process                                                                              |
| CUL5    | cullin 5                                                       | cytoplasm; membrane; nucleus           | G1/S transition of mitotic cell cycle; cell cycle arrest; cytosolic calcium ion homeostasis; induction of apoptosis by intracellular signals       |
| CUL7    | cullin 7                                                       | cytoplasm                              | proteolysis; regulation of mitotic metaphase/anaphase transition; ubiquitin-dependent protein catabolic process; vasculogenesis                    |
| CYSLTR2 | cysteinyl leukotriene receptor 2                               | cell membrane                          | immune response                                                                                                                                    |
| DAB2    | disabled homolog 2, mitogen-responsive phosphoprotein          | cytoplasmic vesicle; membrane; nucleus | cell morphogenesis involved in differentiation; pinocytosis; cell proliferation; negative regulation of cell growth                                |
| DARS    | aspartyl-tRNA synthetase                                       | cytoplasm                              | aspartyl-tRNA aminoacylation; translation                                                                                                          |
| DBN1    | drebrin 1                                                      | actin cytoskeleton; cytoplasm          | actin filament organization; cell differentiation; regulation of neuronal synaptic plasticity                                                      |
| DDIT3   | growth arrest and DNA-damage-inducible protein GADD153         | cytoplasm; nucleus                     | cell redox homeostasis; cell cycle; positive regulation of transcription; positive regulation of apoptosis; response to oxidative stress           |
| DDOST   | dolichyl-diphosphooligosaccharide--protein glycosyltransferase | endoplasmic reticulum membrane         | T cell activation; response to cytokine stimulus; protein amino acid terminal N-glycosylation                                                      |
| DDX56   | DEAD (Asp-Glu-Ala-Asp) box polypeptide 56                      | nucleolus; membrane                    | ATP binding; Atp-dependent helicase activity; ATPase activity; poly (A) RNA binding; protein binding                                               |
| DGCR8   | DiGeorge syndrome critical region gene 8                       | cytoplasm; nucleus                     | primary microRNA processing                                                                                                                        |
| DGKA    | diacylglycerol kinase, alpha 80kDa                             | cytoplasm; plasma membrane             | activation of protein kinase C activity by G-protein coupled receptor protein signaling pathway; signal transduction                               |
| DHRS4   | dehydrogenase/reductase (SDR family) member 4                  | mitochondrion; peroxisome              | oxidation reduction                                                                                                                                |

|        |                                                         |                                                               |                                                                                                                                                                                                            |
|--------|---------------------------------------------------------|---------------------------------------------------------------|------------------------------------------------------------------------------------------------------------------------------------------------------------------------------------------------------------|
| DHX9   | DEAH (Asp-Glu-Ala-His) box polypeptide 9                | cytoplasm; nucleus                                            | RNA splicing; cellular response to heat; CRD-mediated mRNA stabilization                                                                                                                                   |
| DIP2B  | DIP2 disco-interacting protein 2 homolog B (Drosophila) | cytoplasm; extracellular vesicular exosome; membrane; nucleus | catalytic activity; molecular function; transcription factor binding                                                                                                                                       |
| DIS3   | DIS3 mitotic control homolog                            | cytoplasm; nucleus                                            | rRNA processing/transcription                                                                                                                                                                              |
| DKC1   | dyskeratosis congenita 1, dyskerin                      | nucleolus; nucleus                                            | rRNA processing/transcription; cell proliferation; pseudouridine synthesis; pseudouridine synthesis; telomere maintenance via telomerase                                                                   |
| DLGAP4 | discs, large (Drosophila) homolog-associated protein 4  | golgi apparatus; cell/plasma membrane; synapse                | cell-cell signaling                                                                                                                                                                                        |
| DNAJC8 | DnaJ (Hsp40) homolog, subfamily C, member 8             | not well defined                                              | RNA splicing                                                                                                                                                                                               |
| DNASE2 | deoxyribonuclease II, lysosomal                         | lysosome                                                      | apoptosis; erythrocyte differentiation                                                                                                                                                                     |
| DNM1   | dynamamin 1                                             | cytoplasm; cytoskeleton; microtubule                          | endocytosis                                                                                                                                                                                                |
| DNMT1  | DNA (cytosine-5-)-methyltransferase 1                   | cytoplasm; nucleus                                            | DNA methylation; chromatin modification; negative regulation of histone H3-K9 methylation; positive regulation of gene expression                                                                          |
| DNPEP  | aspartyl aminopeptidase                                 | cytoplasm                                                     | peptidase; Proteolysis                                                                                                                                                                                     |
| DOCK7  | dedicator of cytokinesis 7                              | cell projection                                               | axonogenesis; cell differentiation; microtubule cytoskeleton organization; positive regulation of peptidyl-serine phosphorylation; activation of Rac GTPase activity; establishment of neuroblast polarity |
| DPF3   | D4, zinc and double PHD fingers, family 3               | nucleus                                                       | chromatin modification; regulation of transcription                                                                                                                                                        |
| DPYSL2 | dihydropyrimidinase-like 2                              | cytoplasm; mitochondrion                                      | cell differentiation; nucleobase, nucleoside, nucleotide and nucleic acid metabolic process; positive regulation of glutamate secretion                                                                    |
| DRAP1  | DR1-associated protein 1 (negative cofactor 2 alpha)    | nucleus                                                       | regulation of transcription                                                                                                                                                                                |
| DRG1   | developmentally regulated GTP binding protein 1         | cytoplasm; nucleus                                            | transcription                                                                                                                                                                                              |
| DRG2   | developmentally regulated GTP binding protein 2         | cytoplasm; mitochondrion                                      | signal transduction                                                                                                                                                                                        |
| DVL1   | dishevelled, dsh homolog 1                              | cytoplasm                                                     | Wnt receptor signaling pathway; neurotransmitter secretion; signal transduction; Transcription; synapse organization; protein localization in nucleus                                                      |



|         |                                                                       |                                                                                               |                                                                                                                                                                             |
|---------|-----------------------------------------------------------------------|-----------------------------------------------------------------------------------------------|-----------------------------------------------------------------------------------------------------------------------------------------------------------------------------|
| DYNLRB1 | dynein, light chain, roadblock-type 1                                 | cytoplasm                                                                                     | microtubule-based movement; visual behavior                                                                                                                                 |
| EEA1    | early endosome antigen 1                                              | cytoplasm; early endosome; plasma membrane                                                    | synaptic vesicle to endosome fusion; early endosome to late endosome transport                                                                                              |
| EEF1B2  | eukaryotic translation elongation factor 1 beta 2                     | cytoplasm                                                                                     | translation                                                                                                                                                                 |
| EEF1G   | eukaryotic translation elongation factor 1 gamma                      | cytosol                                                                                       | response to virus; translational elongation                                                                                                                                 |
| EEF2K   | eukaryotic elongation factor-2 kinase                                 | nucleus; cytoplasm                                                                            | protein amino acid phosphorylation; translational elongation                                                                                                                |
| EEFSEC  | eukaryotic elongation factor, selenocysteine-tRNA-specific            | cytoplasm; nucleus; mitochondrion                                                             | translational elongation; selenocysteine incorporation                                                                                                                      |
| EGFR    | epidermal growth factor receptor                                      | cytoplasm; endosome; extracellular space; nucleus; plasma membrane                            | activation of MAPKK activity; cell-cell adhesion; ossification; epidermal growth factor receptor signaling pathway; cerebral cortex cell migration                          |
| EHMT2   | euchromatic histone-lysine N-methyltransferase 2                      | nucleus                                                                                       | chromatin modification                                                                                                                                                      |
| EIF1AX  | eukaryotic translation initiation factor 1A, X-linked                 | cytoplasm                                                                                     | translational initiation                                                                                                                                                    |
| EIF1B   | eukaryotic translation initiation factor 1B                           | cytoplasm                                                                                     | poly (A) RNA binding; translation initiation factor activity                                                                                                                |
| EIF2AK2 | eukaryotic translation initiation factor 2-alpha kinase 2             | not well defined                                                                              | endoplasmic reticulum unfolded protein response; negative regulation of cell proliferation                                                                                  |
| EIF2B2  | eukaryotic translation initiation factor 2B, subunit 2 beta, 39kDa    | cytoplasm                                                                                     | response to heat; translational initiation; response to glucose stimulus; myelination; response to peptide hormone stimulus                                                 |
| EIF2B5  | eukaryotic translation initiation factor 2B, subunit 5 epsilon, 82kDa | cytoplasm; nucleus                                                                            | astrocyte differentiation; response to heat; response to glucose stimulus; response to peptide hormone stimulus; regulation of translation; response to stress; myelination |
| EIF2C1  | eukaryotic translation initiation factor 2C, 1                        | cytoplasm; nucleus                                                                            | gene silencing by RNA; negative regulation of translation involved in gene silencing by miRNA; nuclear-transcribed mRNA catabolic process; regulation of transcription      |
| EIF2C3  | eukaryotic translation initiation factor 2C, 3                        | cytoplasm; P-body                                                                             | gene silencing by RNA; mRNA catabolic process; negative regulation of translation involved in gene silencing by miRNA                                                       |
| EIF3    | eukaryotic translation initiation factor 4/                           | cytosol; eukaryotic translation initiation factor 4F complex; perinuclear region of cytoplasm | ATP binding; Atp-dependent helicase activity; ATPase activity; poly (A) RNA binding; protein binding; translation initiation factor activity                                |
| EIF4A2  | eukaryotic translation initiation factor 4A2                          | cytosol; eukaryotic translation initiation factor 4F complex; perinuclear region of cytoplasm | ATP binding; Atp-dependent helicase activity; ATPase activity; poly (A) RNA binding; protein binding; translation initiation factor activity                                |

|         |                                                                                       |                                                                                                                                             |                                                                                                                                                                                                                      |
|---------|---------------------------------------------------------------------------------------|---------------------------------------------------------------------------------------------------------------------------------------------|----------------------------------------------------------------------------------------------------------------------------------------------------------------------------------------------------------------------|
| EIF5A   | eukaryotic translation initiation factor 5A                                           | cytoplasm; endoplasmic reticulum; nucleus                                                                                                   | apoptosis; translation; protein transport; positive regulation of cell proliferation; mRNA export from nucleus                                                                                                       |
| EIF5B   | eukaryotic translation initiation factor 5B                                           | cytosol                                                                                                                                     | GTP binding; GTPase activit; poly (A) RNA binding; protein binding; translation intitiator factor activity                                                                                                           |
| ELMO1   | engulfment and cell motility 1                                                        | cytoplasm; nucleus; plasma membrane                                                                                                         | apoptosis; Rac protein signal transduction; phagocytosis, engulfment; actin cytoskeleton organization                                                                                                                |
| ENO1    | enolase 1, (alpha)                                                                    | cytoplasm; nucleus; plasma membrane                                                                                                         | glycolysis; negative regulation of cell growth; negative regulation of transcription from RNA polymerase II promoter; negative regulation of transcription, DNA-dependent; response to virus                         |
| ENO3    | enolase 3 (beta, muscle)                                                              | cytoplasm                                                                                                                                   | glycolysis                                                                                                                                                                                                           |
| ENSA    | endosulfine alpha                                                                     | cytoplasm                                                                                                                                   | response to nutrient                                                                                                                                                                                                 |
| EPB41   | erythrocyte membrane protein band 4.1 (elliptocytosis 1, RH-linked)                   | cytoplasm; nucleus; plasma membrane                                                                                                         | actin cytoskeleton organization                                                                                                                                                                                      |
| EPPK1   | epiplakin 1                                                                           | cytoplasm; cytoskeleton                                                                                                                     | poly (A) RNA binding                                                                                                                                                                                                 |
| EPS8    | epidermal growth factor receptor pathway substrate 8                                  | synaptosome                                                                                                                                 | actin cytoskeleton reorganization; cell proliferation; response to ethanol; epidermal growth factor receptor signaling pathway; signal transduction                                                                  |
| ERCC8   | excision repair cross-complementing rodent repair deficiency, complementation group 8 | nuclear membrane; nucleus                                                                                                                   | nucleotide-excision repair/transcription coupled; response to oxidative stress; positive regulation of DNA repair                                                                                                    |
| ERO1L   | ERO1-like protein alpha                                                               | endoplasmic reticulum membrane; peripheral membrane protein                                                                                 | brown fat cell differentiation; electron transport chain; endoplasmic reticulum unfolded protein response; protein thiol-disulfide exchange                                                                          |
| ESF1    | nucleolar pre-rRNA processing protein                                                 | nucleolus; nucleus                                                                                                                          | poly (A) RNA binding                                                                                                                                                                                                 |
| ETFB    | electron-transfer-flavoprotein, beta polypeptide                                      | mitochondrial matrix                                                                                                                        | electron transport chain                                                                                                                                                                                             |
| ETNK2   | ethanolamine kinase 2                                                                 | undefined                                                                                                                                   | phosphatidylethanolamine biosynthetic process; phospholipid biosynthetic process                                                                                                                                     |
| EXOSC3  | exosome component 3                                                                   | cytoplasm; nucleus                                                                                                                          | rRNA processing                                                                                                                                                                                                      |
| FAF1    | Fas (TNFRSF6) associated factor 1                                                     | cytoplasm; nucleus                                                                                                                          | cell death; positive regulation of apoptosis; regulation of cell adhesion; proteasomal ubiquitin-dependent protein catabolic process; cytoplasmic sequestering of NF-kappaB; regulation of protein catabolic process |
| FAM129B | family with sequence similarity 129, member B                                         | actin cytoskeleton; adherens junction; cytoplasm; cytosol; extracellular vascular exosome; nucleolus; nucleoplasm; nucleus; plasma membrane | negative regulation of apoptotic process                                                                                                                                                                             |

|        |                                                         |                                                                                                              |                                                                                                                                  |
|--------|---------------------------------------------------------|--------------------------------------------------------------------------------------------------------------|----------------------------------------------------------------------------------------------------------------------------------|
| FANCI  | fanconi anemia, complementation group I                 | cytoplasm; nucleus                                                                                           | DNA repair; Cell cycle                                                                                                           |
| FARP2  | FERM, RhoGEF and pleckstrin domain protein 2            | cytoplasm; cell/plasma membrane                                                                              | Rac protein signal transduction; neuron remodeling; regulation of Rho protein signal transduction                                |
| FASN   | fatty acid synthase                                     | cytoplasm; golgi apparatus; melasome; mitochondrion                                                          | fatty acid biosynthetic process; fatty acid metabolic process; oxidation reduction                                               |
| FBXL15 | F-box and leucine-rich repeat protein 15                | SCF ubiquitin complex; cytoplasm                                                                             | protein binding; contributes to ubiquiti-protein transferase activity                                                            |
| FBXO38 | F-box protein 38                                        | cytoplasm; nucleus                                                                                           | undefined                                                                                                                        |
| FBXO8  | F-box protein 8                                         | cell junction; nucleus; not trans-Golgi network; ubiquitin ligase complex                                    | regulation of ARF protein signal transduction; ubiquitin-dependent protein catabolic process                                     |
| FKBP4  | FK506 binding protein 4, 59kDa                          | cytoplasm                                                                                                    | androgen receptor signaling pathway; copper ion transport; negative regulation of microtubule polymerization or depolymerization |
| FLNA   | filamin A, Alpha-filamin                                | actin; cytoplasm; cytoskeleton; extracellular space; myofibril;nucleus; plasma membrane; trans-golgi network | actin cytoskeleton reorganization; early endosome to late endosome transport; establishment of protein localization              |
| FLNB   | filamin B, beta                                         | actin; cytoplasm; cytoskeleton; myofibril; plasma membrane                                                   | actin cytoskeleton organization; cell differentiation; signal transduction                                                       |
| FMR1   | fragile X mental retardation 1                          | cytoplasm                                                                                                    | mRNA transport; negative regulation of translational initiation                                                                  |
| FNBP4  | formin binding protein 4                                | nucleoplasm                                                                                                  | protein binding                                                                                                                  |
| FTH1-A | ferritin, heavy polypeptide 1                           | cytoplasm; extracellular vesicular exosome; intracellular ferritin complex; mitochondrion; nucleus           | ferric ion binding; ferroxidase activity; iron ion binding; protein binding                                                      |
| FTSJD2 | FtsJ methyltransferase domain containing 2              | nucleus                                                                                                      | methyltransferase                                                                                                                |
| FUBP1  | far upstream element (FUSE) binding protein 1           | nucleus                                                                                                      | regulation of transcription                                                                                                      |
| Fus    | fus fusion, derived from t(12;16) malignant liposarcoma | cytoplasm; nucleus                                                                                           | angiogenesis                                                                                                                     |
| FXR1   | fragile X mental retardation, autosomal homolog 1       | cytoplasm; nucleolus; nucleus                                                                                | apoptosis; negative regulation of translation; cell differentiation                                                              |
| GAA    | glucosidase, alpha; acid                                | lysosome                                                                                                     | carbohydrate metabolic process                                                                                                   |

|         |                                                           |                                                                                                             |                                                                                                                      |
|---------|-----------------------------------------------------------|-------------------------------------------------------------------------------------------------------------|----------------------------------------------------------------------------------------------------------------------|
| GABARAP | gamma-aminobutyric acid receptor associated protein       | cytoplasm; cytoskeleton; endoplasmic reticulum; golgi apparatus membrane                                    | microtubule cytoskeleton organization; protein transport; synaptic transmission; protein targeting                   |
| GABRB1  | gamma-aminobutyric acid (GABA) A receptor, subunit beta 1 | synapse; cell/plasma membrane                                                                               | ion transport; signal transduction                                                                                   |
| GANAB   | glucosidase, alpha; neutral AB                            | endoplasmic reticulum; golgi apparatus; melanosome                                                          | carbohydrate metabolic process                                                                                       |
| GAPDH   | glyceraldehyde-3-phosphate dehydrogenase                  | cytoplasm; cell/plasma membrane                                                                             | glucose metabolism/glycolysis; oxidation reduction                                                                   |
| GARS    | glycyl-tRNA synthetase                                    | cytoplasm; mitochondrion                                                                                    | cell death; diadenosine tetraphosphate biosynthetic process; glycyl-tRNA aminoacylation                              |
| GART    | phosphoribosylglycinamide formyltransferase               | cytoplasm                                                                                                   | biosynthetic process                                                                                                 |
| GCC2    | GRIP and coiled-coil domain-containing protein 2          | cytoplasm; golgi apparatus membrane; peripheral membrane protein                                            | late endosome to Golgi transport/protein localization of golgi and lysosome; retrograde transport, endosome to Golgi |
| GDAP1   | ganglioside-induced differentiation associated protein    | cytoplasm                                                                                                   | response to retinoic acid                                                                                            |
| GFM1    | G elongation factor, mitochondrial 1                      | mitochondrion                                                                                               | mitochondrial translational elongation                                                                               |
| GFM2    | G elongation factor, mitochondrial 2                      | mitochondrion                                                                                               | mitochondrial translation; ribosome disassembly                                                                      |
| GFPT1   | glutamine--fructose-6-phosphate transaminase 1            | cytoplasm                                                                                                   | carbohydrate biosynthetic process                                                                                    |
| GLMN    | glomulin, FKBP associated protein                         | intracellular                                                                                               | positive regulation of cytokine secretion                                                                            |
| GLO1    | glyoxalase I                                              | cytoplasm                                                                                                   | carbohydrate metabolic process                                                                                       |
| GLUD1   | glutamate dehydrogenase 1                                 | cytoplasm; mitochondrial matrix                                                                             | oxidation reduction                                                                                                  |
| GNB2L1  | guanine nucleotide-binding protein beta subunit 2-like 1  | cytoplasm; cytoskeleton; cytosol; dendrite; midbody; mitochondrion; neuronal cell body; nucleus; perikaryon | SH2 domain binding                                                                                                   |
| GPAM    | glycerol-3-phosphate acyltransferase, mitochondrial       | cytoplasm; mitochondrion outer membrane                                                                     | acyl-CoA metabolic process                                                                                           |
| GPC2    | glypican 2                                                | cell membrane; endoplasmic reticulum; extracellular space                                                   | neuron differentiation                                                                                               |

|          |                                                                         |                                                     |                                                                                               |
|----------|-------------------------------------------------------------------------|-----------------------------------------------------|-----------------------------------------------------------------------------------------------|
| GPR98    | G-protein coupled receptor 98                                           | cytoplasm; membrane; secreted                       | G-protein coupled receptor protein signaling pathway                                          |
| GPX4     | glutathione peroxidase 4 (phospholipid hydroperoxidase)                 | mitochondrion; cytoplasm; nucleus                   | chromatin organization; spermatogenesis                                                       |
| GRPEL1   | GrpE-like 1, mitochondrial                                              | mitochondrial matrix                                | protein folding; protein import into mitochondrial matrix                                     |
| GRPEL2   | GrpE-like 2, mitochondrial                                              | mitochondrial matrix                                | protein folding; protein import into mitochondrial matrix                                     |
| GSN      | gelsolin                                                                | actin; cytoplasm; cytoskeleton; extracellular space | apoptosis; vesicle-mediated transport                                                         |
| GSTO1    | glutathione S-transferase omega 1                                       | cytoplasm                                           | L-ascorbic acid biosynthetic process                                                          |
| GTF2B    | general transcription factor IIB                                        | nucleus                                             | RNA elongation from RNA polymerase II promoter/initiation/DNA-dependent                       |
| GTF2I    | general transcription factor Iii                                        | cytoplasm; nucleus                                  | regulation of transcription; signal transduction                                              |
| GTF2IRD1 | GTF2I repeat domain containing 1                                        | nucleus                                             | regulation of transcription, DNA-dependent                                                    |
| GTPBP4   | GTP binding protein 4                                                   | cytoplasm; nucleus                                  | regulation of cell migration/ adhesion/collegen binding                                       |
| GUK1     | guanylate kinase 1                                                      | not well defined                                    | purine nucleotide metabolic process                                                           |
| GYS1     | glycogen synthase 1 (muscle)                                            | cytoplasm; cytosol; inclusion body; membrane        | glucose binding; glycogen synthase activity; protein binding                                  |
| HAGH     | hydroxyacylglutathione hydrolase                                        | cytoplasm; mitochondrion                            | carbohydrate metabolic process; glutathione biosynthetic process                              |
| HARS     | histidyl-tRNA synthetase                                                | cytoplasm                                           | histidyl-tRNA aminoacylation; translation                                                     |
| HAT1     | histone acetyltransferase 1                                             | cytoplasm; nucleus                                  | chromatin modification; histone acetylation                                                   |
| HCN2     | hyperpolarization activated cyclic nucleotide-gated potassium channel 2 | membrane; synapse                                   | cation transport; cell-cell signaling; response to hormone stiumulus; transmembrane transport |
| HDAC1    | histone deacetylase 2                                                   | nucleus; cytoplasm                                  | anti-apoptosis; protein amino acid deacetylation                                              |

|          |                                                                           |                                                                                                             |                                                                                        |
|----------|---------------------------------------------------------------------------|-------------------------------------------------------------------------------------------------------------|----------------------------------------------------------------------------------------|
| HDAC2    | histone deacetylase 2                                                     | cytoplasm; nucleus                                                                                          | cellular response to heat; chromatin remodeling; histone deacetylation                 |
| HDAC6    | histone deacetylase 6                                                     | cytoplasm; nucleus                                                                                          | aggresome assembly; cellular response to hydrogen peroxide                             |
| HDAC7    | histone deacetylase 7                                                     | cytoplasm; nucleus                                                                                          | B cell activation; B cell differentiation; cell-cell junction assembly                 |
| HDGF     | HDGF hepatoma-derived growth factor                                       | cytoplasm; extracellular space; nucleus                                                                     | signal transduction; transcription                                                     |
| HDLBP    | high density lipoprotein binding protein                                  | cytoplasm; nucleus; plasma membrane                                                                         | cholesterol metabolic process; lipid transport; steroid metabolic process              |
| HIF1AN   | hypoxia inducible factor 1, alpha subunit inhibitor                       | nucleus                                                                                                     | oxidation reduction; regulation of transcription                                       |
| HINT1    | histidine triad nucleotide binding protein 1                              | cytoplasm; nucleus                                                                                          | signal transduction                                                                    |
| HIP1R    | huntingtin interacting protein 1 related                                  | cell/plasma membrane                                                                                        | regulation of endocytosis or receptor mediated                                         |
| HIST3H2A | histone cluster 3, H2a                                                    | chromatin; nucleus                                                                                          | nucleosome assembly                                                                    |
| HIST4H4  | histone cluster 4, H4                                                     | chromatin; nucleus                                                                                          | nucleosome assembly                                                                    |
| HK1      | hexokinase 1                                                              | mitochondrion outer membrane; peripheral membrane                                                           | carbohydrate metabolic process; glycolysis                                             |
| HK2      | hexokinase 2                                                              | mitochondrion                                                                                               | carbohydrate metabolic process; glucose metabolic process                              |
| HMGA1    | high mobility group AT-hook 1                                             | cytoplasm; chromatin; nucleus                                                                               | DNA replication; protein assembly; chromatin remodeling                                |
| HMGB1    | high-mobility group box 1                                                 | cytoplasm; extracellular space; nucleus; plasma membrane                                                    | DNA ligation involved in DNA repair; DNA topological change; dendritic cell chemotaxis |
| HMGB2    | High mobility group protein B2; High mobility group protein 2             | condensed chromosome; cytoplasm; extracellular space; nucleoplasm, nucleus; perinuclear region of cytoplasm | DNA ligation involved in DNA repair; cell chemotaxis; chromatin organization           |
| HMGB3    | high-mobility group box 3                                                 | nucleus                                                                                                     | DNA recombination                                                                      |
| HMGB3    | solute carrier family 9 (sodium/hydrogen exchanger), member 3 regulator 1 | cytoplasm; plasma membrane                                                                                  | Wnt receptor signaling pathway                                                         |

|          |                                                                               |                                                                                                                    |                                                                                               |
|----------|-------------------------------------------------------------------------------|--------------------------------------------------------------------------------------------------------------------|-----------------------------------------------------------------------------------------------|
| HNRNPD   | heterogeneous nuclear ribonucleoprotein D                                     | cytoplasm; nucleus; ribonucleosomes;                                                                               | RNA splicing; RNA processing; mRNA stabilization                                              |
| HNRNPM   | heterogeneous nuclear ribonucleoprotein M                                     | nucleus; plasma membrane                                                                                           | RNA splicing                                                                                  |
| HNRNPUL2 | heterogeneous nuclear ribonucleoprotein U-like protein 2                      | nucleus                                                                                                            | induction of cell death                                                                       |
| HNRPLL   | heterogeneous nuclear ribonucleoprotein L-like                                | nucleus; ribosome                                                                                                  | RNA splicing; mRNA processing                                                                 |
| HPRT1    | hypoxanthine phosphoribosyltransferase 1                                      | cytoplasm                                                                                                          | hypoxanthine metabolic process; nucleoside metabolic process                                  |
| HSD17B4  | hydroxysteroid (17-beta) dehydrogenase 4                                      | peroxisome                                                                                                         | oxidation reduction; fatty acid metabolic process                                             |
| HSD17B12 | hydroxysteroid (17-beta) dehydrogenase 12                                     | endoplasmic membrane                                                                                               | oxidation reduction; positive regulation of cell-substrate adhesion                           |
| HSP90AA1 | heat shock protein 90kDa alpha (cytosolic), class A member 1                  | cytoplasm                                                                                                          | mitochondrial outer membrane translocase complex assembly                                     |
| HSPA5    | heat shock 70kDa protein 5 (glucose-regulated protein, 78kDa)                 | cell surface; perinuclear cytoplasm; ER-Golgi intermediate compartment; endoplasmic reticulum; melanosome; nucleus | ER-associated protein catabolic process; anti-apoptosis                                       |
| IARS     | isoleucyl-tRNA synthetase                                                     | cytoplasm                                                                                                          | isoleucyl-tRNA aminoacylation                                                                 |
| IDE      | insulin-degrading enzyme                                                      | cytoplasm; mitochondrion; nucleus; peroxisome; extracellular space                                                 | proteolysis; signal transduction; beta-amyloid metabolic process                              |
| IDH3A    | isocitrate dehydrogenase 3 (NAD+) alpha                                       | mitochondrion                                                                                                      | NADH metabolic process; carbohydrate metabolic process                                        |
| IFRD1    | interferon-related developmental regulator 1                                  | nucleus                                                                                                            | muscle cell differentiation; myoblast cell fate determination                                 |
| IFT20    | intraflagellar transport 20 homolog (Chlamydomonas)                           | centrosome; cytoplasm; golgi apparatus                                                                             | cell projection organization                                                                  |
| IGBP1    | Immunoglobulin-binding protein 1                                              | cytoplasm                                                                                                          | B cell activation; regulation of signal transduction                                          |
| IGF2R    | cation-independent mannose-6-phosphate receptor                               | cytoplasm; endosome; extracellular space; membrane; lysosome membrane                                              | positive regulation of apoptosis; response to retinoic acid                                   |
| IKBKE    | inhibitor of kappa light polypeptide gene enhancer in B-cells, kinase epsilon | cytoplasm; nucleus; endosome                                                                                       | DNA damage response, signal transduction resulting in induction of apoptosis; immune response |

|         |                                                                                    |                                                                                        |                                                                                                           |
|---------|------------------------------------------------------------------------------------|----------------------------------------------------------------------------------------|-----------------------------------------------------------------------------------------------------------|
| IL12RB2 | interleukin 12 receptor, beta 2                                                    | cell/plasma membrane                                                                   | cell surface receptor linked signaling pathway; peptidyl-tyrosine phosphorylation                         |
| ILF3    | interleukin enhancer binding factor 3                                              | cytoplasm; mitochondria; nucleolus; nucleus                                            | positive or negative regulation of transcription                                                          |
| IP6K2   | inositol hexakisphosphate kinase 2                                                 | nucleus                                                                                | negative regulation of cell growth; positive regulation of apoptosis; phosphoinositide phosphorylation    |
| IRS1    | Insulin receptor substrate-1                                                       | nucleus; caveola; cytoplasm; microsome; plasma membrane                                | cellular response to insulin stimulus; negative insulin receptor signaling pathway                        |
| ITGA3   | integrin, alpha 3 (antigen CD49C, alpha 3 subunit of VLA-3 receptor)               | Membrane; Single-pass type I membrane protein; synaptosome                             | cell-matrix adhesion; neuron migration; integrin-mediated signaling pathway                               |
| ITGAL   | integrin, alpha L (antigen CD11A (p180), lymphocyte function-associated antigen 1) | membrane                                                                               | heterophilic cell-cell adhesion; inflammatory response; leukocyte cell-cell adhesion; signal transduction |
| ITGAV   | integrin, alpha V (vitronectin receptor, alpha polypeptide, antigen CD51)          | plasma membrane                                                                        | apoptotic cell clearance; cell adhesion                                                                   |
| ITIH1   | inter-alpha (globulin) inhibitor H1                                                | secreted/extracellular                                                                 | hyaluronan metabolic process; leukocyte activation                                                        |
| ITPR2   | inositol 1,4,5-triphosphate receptor, type 2                                       | cytoplasm; integral to membrane; microsome; sarcoplasmic reticulum membrane;           | calcium ion transport; ion transport/transmembrane; signal transduction                                   |
| ITSN1   | intersectin 1 (SH3 domain containing)                                              | cell junction; cell projection; cytoplasm; endomembrane system; lamellipodium; synapse | apoptosis; regulation of Rho protein signal transduction                                                  |
| IVD     | Isovaleryl-CoA dehydrogenase                                                       | mitochondrial matrix                                                                   | leucine catabolic process; oxidation reduction                                                            |
| JPH2    | junctophilin 2                                                                     | endoplasmic reticulum membrane; plasma membrane; sarcoplasmic reticulum membrane       | calcium ion transport into cytosol; regulation of ryanodine-sensitive calcium-release channel activity    |
| JPH3    | junctophilin3                                                                      | cell/plasma membrane; endoplasmic reticulum; microsome; sarcoplasmic reticulum         | calcium homeostasis; cell migration/cell-cell migration/collagen                                          |
| JUN     | jun proto-oncogene                                                                 | nucleus                                                                                | response to cytokine stimulus; angiogenesis; cellular response to potassium ion starvation                |
| KARS    | lysyl-tRNA synthetase                                                              | cytoplasm; membrane; mitochondrion; nucleus                                            | lysyl-tRNA aminoacylation; tRNA processing                                                                |
| KAT2A   | K(lysine) acetyltransferase 2A                                                     | nucleus                                                                                | cell proliferation; chromatin remodeling; histone deubiquitination                                        |
| KCNQ3   | potassium voltage-gated channel, subfamily G, member 3                             | cytoplasm; endoplasmic reticulum; membrane                                             | transmembrane transport; ion transport                                                                    |



|         |                                                               |                                                                                            |                                                                                             |
|---------|---------------------------------------------------------------|--------------------------------------------------------------------------------------------|---------------------------------------------------------------------------------------------|
| KCNQ1   | potassium voltage-gated channel, KQT-like subfamily, member 1 | Membrane; Multi-pass membrane protein                                                      | gene silencing; ion transport                                                               |
| KCNQ2   | potassium voltage-gated channel, KQT-like subfamily, member 2 | Membrane; Multi-pass membrane protein.                                                     | potassium ion transport; synaptic transmission; transmembrane transport                     |
| KIF13A  | kinesin family member 13A                                     | cytoplasm/microtubule                                                                      | regulation of microtubule-based movement; protein transport                                 |
| KIF1B   | kinesin family member 1B                                      | cytoplasm; cytoskeleton; mitochondria                                                      | anterograde axon cargo transport; apoptosis; cytoskeleton-dependent intracellular transport |
| KIF2C   | kinesin family member 2C                                      | cytoplasm/microtubule; Nucleus; chromatin                                                  | cell cycle; cell division; cell proliferation; microtubule depolymerization                 |
| KIF3B   | kinesin family member 3B                                      | cytosol/microtubule                                                                        | microtubule based movement                                                                  |
| KIFC1   | kinesin family member C1                                      | centrosome; early endosome; nucleus                                                        | cell cycle; mitotic sister chromatid segregation                                            |
| KLC1    | kinesin light chain 1                                         | cytosol; microtubule                                                                       | microtubule based movement                                                                  |
| KLF2    | kruppel-like factor 2                                         | nucleus                                                                                    | metal ion binding; protein binding                                                          |
| KPNA4   | karyopherin alpha 4 (importin alpha 3)                        | cytoplasm; nucleus                                                                         | intracellular protein transport                                                             |
| LAMC1   | laminin, gamma 1 (formerly LAMB2)                             | Secreted › extracellular space › extracellular matrix › basement membrane.                 | cell adhesion; cell migration; extracellular matrix disassembly                             |
| LARS    | leucyl-tRNA synthetase                                        | cytoplasm                                                                                  | leucyl-tRNA aminoacylation                                                                  |
| LASS2   | LAG1 homolog, ceramide synthase 2                             | endoplasmic reticulum membrane; nuclear membrane                                           | lipid biosynthesis; sphingolipid metabolic process; transcription                           |
| LDLRAP1 | low density lipoprotein receptor adaptor protein 1            | cytoplasm; cell/plasma membrane                                                            | cholesterol homeostasis/metabolism/transport/steroid metabolism                             |
| LEO1    | Leo1, Paf1/RNA polymerase II complex component, homolog       | nucleus                                                                                    | transcription                                                                               |
| LGALS3  | lectin, galactoside-binding, soluble, 3                       | cytoplasm; cell/plasma membrane; extracellular proteinaceous space; mitochondrion; nucleus | cell differentiation; extracellular matrix organization                                     |
| LIG1    | ligase I, DNA, ATP-dependent                                  | nucleus                                                                                    | DNA recombination; DNA repair; DNA replication; Cell cycle;                                 |

|          |                                                      |                                                        |                                                                                          |
|----------|------------------------------------------------------|--------------------------------------------------------|------------------------------------------------------------------------------------------|
| LIN7C    | lin-7 homolog C                                      | cell junction; membrane                                | exocytosis; neurotransmitter secretion                                                   |
| LRPAP1   | alpha-2-macroglobulin receptor-associated protein    | cell surface; cytoplasm; endoplasmic reticulum         | cell proliferation; vesicle-mediated transport                                           |
| LSM3     | LSM3 homolog, U6 small nuclear RNA associated        | nucleus                                                | mRNA processing; RNA splicing                                                            |
| LSM5     | LSM5 homolog, U6 small nuclear RNA associated        | nucleus                                                | RNA splicing                                                                             |
| LTA4H    | leukotriene A4 hydrolase                             | cytoplasm; nucleus                                     | inflammatory response; proteolysis                                                       |
| MACF1    | microtubule-actin crosslinking factor 1              | cytoplasm; cytoskeleton                                | Wnt receptor signaling pathway;                                                          |
| MAD1L1   | MAD1 mitotic arrest deficient-like 1                 | centrosome; cytoplasm; kinetochore; nucleus            | cell cycle; cell division                                                                |
| MAN2A1   | mannosidase, alpha, class 2A, member 1               | golgi; membrane                                        | N-glycan processing; carbohydrate metabolic process                                      |
| MAP1B    | microtubule-associated protein 1B                    | cytoplasm; cell/plasma membrane                        | induction of synaptic plasticity by chemical substance                                   |
| MAP1LC3A | microtubule-associated protein 1 light chain 3 alpha | cytoplasm; endomembrane system; autophagosome membrane | autophagic vacuole assembly                                                              |
| MAP2K2   | mitogen-activated protein kinase kinase 2            | cytosol                                                | MAPKKK cascade; Ras protein signal transduction                                          |
| MAP2K4   | mitogen-activated protein kinase kinase 4            | not well defined                                       | protein amino acid phosphorylation; signal transduction; JNK cascade                     |
| MAP2K7   | mitogen-activated protein kinase kinase 7            | cytoplasm; nucleus                                     | protein amino acid phosphorylation                                                       |
| MAP3K3   | mitogen-activated protein kinase kinase kinase 3     | cytoplasm                                              | MAPKKK cascade                                                                           |
| MAPK1    | mitogen-activated protein kinase 1                   | cytoplasm; nucleus                                     | cell cycle; chemotaxis; positive regulation of transcription                             |
| MARS2    | methionyl-tRNA synthetase 2, mitochondrial           | mitochondrial matrix; cytoplasm                        | methionyl-tRNA aminoacylation                                                            |
| MBP      | myelin basic protein                                 | plasma membrane                                        | immune response; myelination; negative regulation of axonogenesis; synaptic transmission |

|        |                                                                                                |                                                                                         |                                                                                        |
|--------|------------------------------------------------------------------------------------------------|-----------------------------------------------------------------------------------------|----------------------------------------------------------------------------------------|
| MCM2   | minichromosome maintenance complex component 2                                                 | chromatin; nucleus                                                                      | DNA replication; DNA unwinding involved in replication                                 |
| MCM3   | minichromosome maintenance complex component 3                                                 | cytoplasm; nucleus                                                                      | DNA replication; cell cycle                                                            |
| MCM4   | minichromosome maintenance complex component 4                                                 | nucleus                                                                                 | DNA replication; regulation of transcription; DNA unwinding involved in replication    |
| MCM5   | minichromosome maintenance complex component 5                                                 | nucleus                                                                                 | DNA replication; regulation of transcription                                           |
| MCM6   | minichromosome maintenance complex component 6                                                 | nucleus                                                                                 | regulation of transcription; cell cycle; DNA replication                               |
| MDH1   | malate dehydrogenase 1, NAD                                                                    | cytoplasm; mitochondrion                                                                | cellular carbohydrate metabolic process                                                |
| ME2    | malic enzyme 2, NAD(+)-dependent, mitochondrial                                                | mitochondrial matrix                                                                    | oxidation reduction; malate metabolic process                                          |
| MEA1   | male-enhanced antigen 1                                                                        | cytoplasm                                                                               | cell differentiation; spermatogenesis                                                  |
| MECP2  | methyl CpG binding protein 2                                                                   | nucleus                                                                                 | negative regulation of transcription                                                   |
| MED13  | mediator complex subunit 13                                                                    | nucleus                                                                                 | androgen receptor signaling pathway                                                    |
| METAP1 | methionine aminopeptidase 1                                                                    | cytoplasm                                                                               | proteolysis; regulation of translation                                                 |
| METTL3 | methyltransferase like 3                                                                       | nucleus speckle                                                                         | RNA methylation; nucleobase, nucleoside, nucleotide and nucleic acid metabolic process |
| MGST1  | microsomal glutathione S-transferase 1                                                         | Mitochondrion membrane; endoplasmic reticulum; microsome; nucleus; peroxisomal membrane | leydig cell differentiation; glutathione metabolic process                             |
| MKI67  | antigen identified by monoclonal antibody Ki-67                                                | nucleus; cytoplasm                                                                      | cell cycle; meiosis                                                                    |
| MKNK2  | MAP kinase interacting serine/threonine kinase 2                                               | not well defined                                                                        | protein amino acid phosphorylation; regulation of translation                          |
| MLL3   | myeloid/lymphoid or mixed-lineage leukemia (trithorax homolog, Drosophila); translocated to, 3 | nucleus; cytoplasm                                                                      | regulation of transcription, DNA-dependent                                             |
| MMP13  | matrix metalloproteinase 13 (collagenase 3)                                                    | extracellular space ; extracellular matrix                                              | collagen catabolic process; proteolysis                                                |

|           |                                                                                                                                         |                                                                                       |                                                                       |
|-----------|-----------------------------------------------------------------------------------------------------------------------------------------|---------------------------------------------------------------------------------------|-----------------------------------------------------------------------|
| MNT       | MAX binding protein                                                                                                                     | nucleus                                                                               | regulation of cell cycle                                              |
| MOCS1     | molybdenum cofactor synthesis 1                                                                                                         | nucleus                                                                               | mo-molybdopterin cofactor biosynthetic process                        |
| MPHOSPH10 | M-phase phosphoprotein 10 (U3 small nucleolar ribonucleoprotein)                                                                        | nucleolus; nucleus                                                                    | mRNA processing ; rRNA processing                                     |
| MPND      | MPN domain-containing protein                                                                                                           | undefined                                                                             | peptidase                                                             |
| MRPS28    | mitochondrial ribosomal protein S28                                                                                                     | mitochondrion; mitochondrial small ribosomal subunit                                  | poly (A) RNA binding                                                  |
| MSH6      | mutS homolog 6                                                                                                                          | nucleus; chromatin                                                                    | DNA damage response                                                   |
| MTA1      | metastasis associated 1                                                                                                                 | nucleus; cytoplasm                                                                    | regulation of transcription, DNA-dependent; signal transduction       |
| MTA2      | metastasis associated 1 family, member 2                                                                                                | nucleus                                                                               | chromatin assembly or disassembly                                     |
| MTA3      | metastasis associated 1 family, member 3                                                                                                | cytoplasm; nucleus                                                                    | regulation of transcription, DNA-dependent                            |
| MTAP      | methylthioadenosine phosphorylase                                                                                                       | cytoplasm                                                                             | nucleobase, nucleoside, nucleotide and nucleic acid metabolic process |
| MTHFD1    | methylenetetrahydrofolate dehydrogenase (NADP+ dependent) 1, methenyltetrahydrofolate cyclohydrolase, formyltetrahydrofolate synthetase | cytoplasm; mitochondrion                                                              | oxidation reduction; folic acid and derivative biosynthetic proces    |
| MTMR3     | myotubularin related protein 3                                                                                                          | cytoplasm; cell/plasma membrane                                                       | dephosphorylation                                                     |
| MTTP      | microsomal triglyceride transfer protein                                                                                                | endoplasmic reticulum                                                                 | lipid metabolic process                                               |
| MTX1      | metaxin 1                                                                                                                               | mitochondrion outer membrane                                                          | protein transport                                                     |
| MVP       | major vault protein                                                                                                                     | cytoplasm; nucleus                                                                    | mRNA transport; protein transport; transmembrane transport            |
| MYBBP1AN  | MYB binding protein (P160) 1a                                                                                                           | cytoplasm; nucleolus; nucleus                                                         | protein transport; transcription                                      |
| MYCBP     | c-myc binding protein                                                                                                                   | centrosome; cytoskeleton; cytoplasm; kinetochore; microtubule; mitochondrion; nucleus | regulation of transcription; spermatogenesis                          |

|         |                                                                                   |                                                                                                  |                                                                                  |
|---------|-----------------------------------------------------------------------------------|--------------------------------------------------------------------------------------------------|----------------------------------------------------------------------------------|
| MyD88   | myeloid differentiation primary response protein 88                               | cytoplasm; intrinsic to membrane                                                                 | I-kappaB kinase/NF-kappaB cascade; anti-apoptosis                                |
| Myh 10  | myosin, heavy polypeptide 10, non-muscle                                          | cytoplasm                                                                                        | exocytosis; myofibril assembly; plasma membrane repair; axonogenesis             |
| MYH10   | myosin, heavy chain 10, non-muscle                                                | cytoplasm; myosin                                                                                | actin filament-based movement; cytokinesis after mitosis                         |
| MYH9    | myosin, heavy chain 9, non-muscle                                                 | cytoplasm; cell/plasma membrane; myosin or actin; nucleus                                        | actin cytoskeleton reorganization; angiogenesis; regulation of cell shape        |
| MYO18A  | myosin XVIII A                                                                    | cytoplasm; golgi apparatus;ER-golgi intermediate compartment; myosin complex; nucleolus; nucleus | anti-apoptosis                                                                   |
| MYO1C   | myosin IC                                                                         | cytoplasm; membrane; nucleus                                                                     | mRNA transport; protein transport; transmembrane transport                       |
| NACA    | nascent polypeptide-associated complex alpha subunit                              | cytoplasm; nucleus                                                                               | translation; transcription                                                       |
| NADSYN1 | NAD synthetase 1                                                                  | cytoplasm; cytosol                                                                               | NAD biosynthetic process;NAD metabolic process; small molecule metabolic process |
| NAGA    | N-acetylgalactosaminidase, alpha-                                                 | lysosome                                                                                         | carbohydrate catabolic process; glycolipid catabolic process                     |
| NAP1L1  | nucleosome assembly protein 1-like 1                                              | melansome; nucleus                                                                               | DNA replication; nucleosome assembly; positive regulation of cell proliferation  |
| NCAPH   | non-SMC condensin I complex, subunit H                                            | chromatin; cytoplasm; nucleus                                                                    | cell division; mitosis; mitotic cell cycle; mitotic chromosome condensation      |
| NCKAP1L | NCK-associated protein 1-like                                                     | SCAR complex; cytoplasm; extracellular exosome; membrane                                         | rac GTPase activator; protein binding                                            |
| NCL     | nucleolin                                                                         | cytoplasm; membrane; nucleolus; nucleus                                                          | ribosomal biogenesis; glucocorticoid receptor signaling pathway                  |
| NDUFA7  | NADH dehydrogenase (ubiquinone) 1 alpha subcomplex, 7, 14.5kDa                    | mitochondrion inner membrane; peripheral membrane protein                                        | mitochondrial electron transport, NADH to ubiquinone transport                   |
| NDUFAB  | NADH dehydrogenase (ubiquinone) 1 alpha subcomplex, 8, 19kDa                      | mitochondrion                                                                                    | NADH dehydrogenase activity and oxidoreductase activity                          |
| NDUFS3  | NADH dehydrogenase (ubiquinone) Fe-S protein 3, 30kDa (NADH-coenzyme Q reductase) | mitochondrion                                                                                    | electron transport chain; induction of apoptosis                                 |
| NDUFS4  | NADH dehydrogenase (ubiquinone) Fe-S protein 4, 18kDa (NADH-coenzyme Q reductase) | mitochondrion                                                                                    | electron transport chain                                                         |

|          |                                                                      |                                                                                                                              |                                                                                               |
|----------|----------------------------------------------------------------------|------------------------------------------------------------------------------------------------------------------------------|-----------------------------------------------------------------------------------------------|
| NEDD4    | neural precursor cell expressed, developmentally down-regulated 4    | cytoplasm                                                                                                                    | cellular response to UV                                                                       |
| NFKB1    | nuclear factor of kappa light polypeptide gene enhancer in B-cells 1 | Nucleus. Cytoplasm. Nuclear, but also found in the cytoplasm in an inactive form complexed to an inhibitor (I-kappa-B)       | anti-apoptosis                                                                                |
| NIF3L1   | NIF3 NGG1 interacting factor 3-like 1                                | cytoplasm; mitochondrion                                                                                                     | positive regulation of transcription, DNA-dependent                                           |
| NME2     | non-metastatic cells 2, protein (NM23B) expressed in                 | centrosome; cytoplasm; cytosol; vesicular exosome; lamellipodium; membrane; nucleus; perinuclear region of cytoplasm; ruffle | ATP binding; RNA polymerase II regulator regions<br>DNA binding; gamma-tubulin binding        |
| NMT1     | N-myristoyltransferase 1                                             | cytoplasm                                                                                                                    | N-terminal protein lipidation; N-terminal protein myristoylation; protein lipoylation         |
| NOC2L    | nucleolar complex associated 2 homolog                               | nucleus, nucleolus                                                                                                           | chromatin binding; poly(A) RNA binding; transcription repression;                             |
| NOS3     | nitric oxide synthase 3 (endothelial cell)                           | caveola; golgi apparatus; cytoplasm/cytoskeleton; nucleus/nucleolus; plasma membrane                                         | anti-apoptosis; arginine catabolic process                                                    |
| NPM1     | nucleophosmin (nucleolar phosphoprotein B23, numatrin)               | cytoplasm; nucleus; ribosome                                                                                                 | cell growth/proliferation; protein transport                                                  |
| NSF      | N-ethylmaleimide-sensitive factor                                    | cytoplasm; dendritic shaft                                                                                                   | proteolysis; regulation of exocytosis                                                         |
| NUCKS    | nuclear casein kinase and cyclin-dependent kinase substrate 1        | cytoplasm; nucleus                                                                                                           | Poly (A) RNA binding                                                                          |
| NUDT2    | nudix (nucleoside diphosphate linked moiety X)-type motif 2          | mitochondrion                                                                                                                | induction of apoptosis; nucleobase, nucleoside, nucleotide and nucleic acid metabolic process |
| NUP133   | nucleoporin 133kDa                                                   | kinetochore; nuclear pore complex;                                                                                           | protein transport; transmembrane transport; nuclear pore organization                         |
| OPA1     | optic atrophy 1 (autosomal dominant)                                 | mitochondrion                                                                                                                | apoptosis                                                                                     |
| OXSR1    | oxidative-stress responsive 1                                        | undefined                                                                                                                    | phosphorylation; response to oxidative stress                                                 |
| PAFAH1B1 | platelet-activating factor acetylhydrolase 1b, regulatory subunit 1  | centrosome; cytoplasm; cytoskeleton; microtubules; nucleus                                                                   | Cell cycle; cell differentiation; cytoskeleton organization                                   |
| PAFAH1B3 | platelet-activating factor acetylhydrolase 1b, catalytic subunit 3   | cytoplasm                                                                                                                    | spermatogenesis; lipid catabolic process                                                      |
| PAPOLA   | poly(A) polymerase alpha                                             | cytoplasm; nucleus                                                                                                           | RNA splicing; mRNA processing; mRNA polyadenylation                                           |

|         |                                                  |                                                                          |                                                                                                 |
|---------|--------------------------------------------------|--------------------------------------------------------------------------|-------------------------------------------------------------------------------------------------|
| PAPSS2  | 3'-phosphoadenosine 5'-phosphosulfate synthase 2 | undefined                                                                | adenylylsulfate kinase activity; nucleotide binding;                                            |
| PARD6A  | par-6 partitioning defective 6 homolog alpha     | cytoplasm; cell/plasma membrane; nucleus                                 | cell cycle; cell division; viral reproduction                                                   |
| PARP1   | poly [ADP-ribose] polymerase-1                   | nucleus                                                                  | protein amino acid ADP-ribosylation; protein amino acid ADP-ribosylation; apoptosis             |
| PASK    | PAS domain containing serine/threonine kinase    | cytoplasm; Golgi apparatus                                               | regulation of transcription, DNA-dependent; protein amino acid phosphorylation                  |
| PC      | pyruvate carboxylase                             | cytoplasm; mitochondrial matrix                                          | oxaloacetate metabolic process; lipid biosynthetic process                                      |
| PCDH11Y | protocadherin 11 Y-linked                        | membrane                                                                 | homophilic cell adhesion                                                                        |
| PCYT1A  | phosphate cytidylyltransferase 1, choline, alpha | cytoplasm; membrane                                                      | phospholipid biosynthetic process                                                               |
| PDCD6IP | programmed cell death 6 interacting protein      | centrosome; cytoplasm; melanosome.                                       | apoptosis; cell cycle; cell division; protein transport                                         |
| PDE1B   | phosphodiesterase 1B, calmodulin-dependent       | cytoplasm                                                                | apoptosis; signal transduction; cAMP catabolic process; cGMP catabolic process; visual learning |
| PDIA4   | protein disulfide isomerase family A, member 4   | endoplasmic reticulum; melanosome                                        | cell redox homeostasis; protein secretion                                                       |
| PDIA6   | protein disulfide isomerase family A, member 6   | endoplasmic reticulum; golgi apparatus cell/plasma membrane; melanosome; | cell redox homeostasis; protein folding                                                         |
| PDK1    | pyruvate dehydrogenase kinase, isozyme 1         | mitochondrial matrix                                                     | carbohydrate metabolic process; glucose metabolic process                                       |
| PDLIM1  | PDZ and LIM domain 1                             | cytoplasm; cytoskeleton; actin                                           | regulation of transcription; response to hypoxia; response to oxidative stress                  |
| PDLIM2  | PDZ and LIM domain 2 (mystique)                  | cytoplasm; cytoskeleton; myosin/actin; nucleus                           | suppresses Anchorage-independent growth; cell migration/cell-cell migration/collagen            |
| PEPD    | peptidase D                                      | not well defined                                                         | peptidase activity; proteolysis                                                                 |
| PEX6    | peroxisomal biogenesis factor 6                  | cytoplasm; peroxisome membrane                                           | peroxisome organization; protein import into peroxisome matrix, translocation                   |
| PGK1    | phosphoglycerate kinase 1                        | cytoplasm                                                                | glycolysis; phosphorylation                                                                     |

|         |                                                       |                                                                                   |                                                                                               |
|---------|-------------------------------------------------------|-----------------------------------------------------------------------------------|-----------------------------------------------------------------------------------------------|
| PGM1    | phosphoglucomutase 1                                  | cytoplasm                                                                         | carbohydrate metabolic process; spermatogenesis                                               |
| PGR     | Progesterone receptor                                 | cytoplasm; intracellular membrane; nucleus                                        | transcription (negative); cell proliferation; signal transduction                             |
| PGRMC1  | progesterone receptor membrane component 1            | endoplasmic reticulum; integral membrane component; nucleolus; vesicular exosome  | heme binding; protein binding; steroid binding;                                               |
| PHACTR3 | phosphatase and actin regulator 3                     | nuclear matrix-intermediate filament scaffold                                     | phosphatase inhibitor                                                                         |
| PIK3C2G | phosphoinositide-3-kinase, class 2, gamma polypeptide | membrane                                                                          | phosphoinositide-mediated signaling                                                           |
| PIK3R4  | phosphoinositide-3-kinase, regulatory subunit 4       | cytoplasm                                                                         | phosphorylation                                                                               |
| PKD2    | polycystic kidney disease 2 (autosomal dominant)      | endoplasmic reticulum; membrane                                                   | JAK-STAT cascade                                                                              |
| PKD2    | polycystic kidney disease 2                           | actin cytoskeleton; endoplasmic reticulum; plasma membrane                        | JAK-STAT cascade; calcium ion transport; cation transport                                     |
| PKP3    | plakophilin 3                                         | cell junction; desmosome; nucleus                                                 | cell adhesion                                                                                 |
| PLD3    | phospholipase D family, member 3                      | cytoplasm; endoplasmic reticulum membrane; golgi apparatus membrane; lipid-anchor | lipid catabolic process                                                                       |
| PLDN    | pallidin homolog                                      | cytoplasm; endomembrane system; endosome; peripheral membrane protein             | post-Golgi vesicle-mediated transport; exocytosis                                             |
| PLEC    | plectin                                               | cytoskeleton; cytoplasm; plasma membrane                                          | hemidesmosome assembly                                                                        |
| PLEK    | pleckstrin                                            | cytoplasm; extracellular region                                                   | actin cytoskeleton reorganization; hemopoietic progenitor cell differentiation                |
| PLOD1   | procollagen-lysine 1, 2-oxoglutarate 5-dioxygenase 1  | rough endoplasmic reticulum membrane                                              | Oxidation reduction; response to hypoxia; hydroxylysine biosynthetic process                  |
| PLOD3   | procollagen-lysine, 2-oxoglutarate 5-dioxygenase 3    | rough endoplasmic reticulum membrane                                              | cellular response to hormone stimulus; Oxidation reduction                                    |
| PMM2    | phosphomannomutase 2                                  | cytoplasm                                                                         | protein amino acid glycosylation; GDP-mannose biosynthetic process                            |
| PMVK    | phosphomevalonate kinase                              | peroxisome; cytoplasm                                                             | cholesterol biosynthetic process; lipid metabolic process; protein amino acid phosphorylation |



|          |                                                               |                                                    |                                                            |
|----------|---------------------------------------------------------------|----------------------------------------------------|------------------------------------------------------------|
| POFUT2   | protein O-fucosyltransferase 2                                | endoplasmic reticulum                              | carbohydrate metabolic process; fucose metabolic process   |
| POLA1    | polymerase (DNA directed), alpha 1, catalytic subunit         | colocalizes with chromatin; cytoplasm; nucleus     | NOT DNA repair; DNA replication                            |
| POLD1    | polymerase (DNA directed), delta 1, catalytic subunit 125kDa  | nucleus                                            | DNA repair; DNA replication                                |
| POLD3    | polymerase (DNA-directed), delta 3, accessory subunit         | nucleus                                            | DNA synthesis involved in DNA repair                       |
| POLDIP3  | polymerase (DNA-directed), delta interacting protein 3        | cytoplasm; nucleus                                 | translation                                                |
| POLR1C   | polymerase (RNA) I polypeptide C                              | nucleus                                            | rRNA processing/transcription                              |
| POLR2A   | polymerase (RNA) II (DNA directed) polypeptide A, 220kDa      | nucleolus; nucleus                                 | RNA splicing; transcription                                |
| PPA1     | pyrophosphatase (inorganic) 1                                 | cytoplasm                                          | phosphate metabolic process; diphosphate metabolic process |
| PPA2     | pyrophosphatase (inorganic) 2                                 | mitochondrion; cytoplasm                           | diphosphate metabolic process                              |
| PPIG     | peptidylprolyl isomerase G                                    | nucleus matrix                                     | RNA splicing                                               |
| PPME1    | protein phosphatase methyltransferase 1                       | not well defined                                   | protein amino acid demethylation                           |
| PPP1R14A | protein phosphatase 1, regulatory (inhibitor) subunit 14A     | cytoplasm                                          | phosphatase inhibitor                                      |
| PPP2CA   | protein phosphatase 2, catalytic subunit, alpha isozyme       | cytoplasm; plasma membrane; mitochondrion; nucleus | RNA splicing; apoptosis; meiosis                           |
| PPP2R2B  | protein phosphatase 2, regulatory subunit B, beta             | cytoplasm; mitochondrion                           | apoptosis; cell death; signal transduction                 |
| PPP2R5E  | protein phosphatase 2, regulatory subunit B', epsilon isoform | cytoplasm; intracellular membrane                  | signal transduction                                        |
| PPP5C    | protein phosphatase 5, catalytic subunit                      | cytoplasm; nucleus                                 | mitosis                                                    |
| PRDX1    | peroxiredoxin 1                                               | cytoplasm; melanosome; mitochondrion; nucleus      | cell proliferation                                         |

|         |                                                              |                                                         |                                                                                     |
|---------|--------------------------------------------------------------|---------------------------------------------------------|-------------------------------------------------------------------------------------|
| PRDX4   | peroxiredoxin 4                                              | cytoplasm; extracellular space; mitochondrion           | I-kappaB phosphorylation; cell redox homeostasis                                    |
| PRDX6   | peroxiredoxin 6                                              | cytoplasm; lysosome; nucleus                            | cell redox homeostasis                                                              |
| PRIM1   | primase, DNA, polypeptide 1                                  | nucleoplasm                                             | DNA replication; transcription                                                      |
| PRKACA  | protein kinase, cAMP-dependent, catalytic, alpha             | cytoplasm; cell/plasma membrane; mitochondrion; nucleus | glutamatergic synaptic transmission; atp synthesis; cell cycle; phosphorylation     |
| PRKD3   | protein kinase D3                                            | cytoplasm; membrane                                     | phosphorylation                                                                     |
| PRKG2   | protein kinase, cGMP-dependent, type II and I                | cytoplasm                                               | protein amino acid phosphorylation; signal transduction                             |
| PRMT3   | protein arginine methyltransferase 3                         | cytoplasm; ribosome                                     | histone-arginine N-methyltransferase;                                               |
| PRPF3   | PRP3 pre-mRNA processing factor 3 homolog                    | nucleus speckle                                         | RNA splicing; mRNA processing; visual perception                                    |
| PRPF40A | PRP40 pre-mRNA processing factor 40 homolog A                | chromatin; nucleus                                      | mRNA processing                                                                     |
| PRPSAP1 | phosphoribosyl pyrophosphate synthetase-associated protein 1 | cytoplasm                                               | nucleobase, nucleoside, nucleotide and nucleic acid metabolic process               |
| PRPSAP2 | phosphoribosyl pyrophosphate synthetase-associated protein 2 | cytoplasm                                               | nucleobase, nucleoside, nucleotide and nucleic acid metabolic process               |
| PSIP1   | PC4 and SFRS1 interacting protein 1                          | cytoplasm; nucleus                                      | stress-induced apoptosis                                                            |
| PSMA6   | proteasome (prosome, macropain) subunit, alpha type, 6       | cytoplasm; nucleus; mitochondrion                       | ubiquitin-dependent protein catabolic process; cell cycle; proteolysis              |
| PSMB3   | proteasome (prosome, macropain) subunit, beta type, 3        | cytoplasm; nucleus                                      | ubiquitin-dependent protein catabolic process; proteolysis; cell cycle              |
| PTGES3  | prostaglandin E synthase 3 (cytosolic)                       | cytoplasm                                               | glucocorticoid receptor signaling pathway; glycogen biosynthetic process            |
| PTGFR   | prostaglandin F receptor (FP)                                | extracellular space; membrane                           | G-protein coupled receptor protein signaling pathway                                |
| PTPN11  | protein tyrosine phosphatase, non-receptor type 11           | cytoplasm; mitochondrion                                | signal transduction; activation of MAPK activity; axonogenesis; glucose homeostasis |

|           |                                                           |                                                      |                                                                                        |
|-----------|-----------------------------------------------------------|------------------------------------------------------|----------------------------------------------------------------------------------------|
| PTPN12    | protein tyrosine phosphatase, non-receptor type 12        | cytoplasm                                            | dephosphorylation                                                                      |
| PTPN12    | PTPN12 protein tyrosine phosphatase, non-receptor type 12 | cytoplasm                                            | phosphatase                                                                            |
| PTRF      | polymerase I and transcript release factor                | caveola; endoplasmic reticulum; mitochondrion        | caveolae formation and stabilization; lipid metabolism                                 |
| RAB11FIP5 | RAB11 family interacting protein 5 (class I)              | cytoplasm; endosome membrane; mitochondrion membrane | transport                                                                              |
| RABEP1    | rabaptin, RAB GTPase binding effector protein 1           | cytoplasm; early endosome                            | apoptosis; endocytosis; protein transport; cellular membrane fusion                    |
| RABGAP1   | RAB GTPase activating protein 1                           | cytoplasm                                            | regulation of Rab GTPase activity; cell cycle                                          |
| RABIF     | RAB interacting factor                                    | cytoplasm                                            | cellular membrane fusion; protein transport; small GTPase mediated signal transduction |
| RALBP1    | ralA binding protein 1                                    | membrane                                             | signal transduction; small GTPase mediated signal transduction                         |
| RAN       | RAN, member RAS oncogene family                           | cytoplasm; melanosome; nucleus                       | cell cycle; cell division; mitosis; protein transport                                  |
| RANBP1    | RAN binding protein 1                                     | cytoplasm; nucleus                                   | signal transduction                                                                    |
| RAP1B     | RAP1B, member of RAS oncogene family                      | cytosol; plasma membrane                             | signal transduction; Cell proliferation; small GTPase mediated signal transduction     |
| RAPGEF2   | Rap guanine nucleotide exchange factor (GEF) 2            | synaptic plasma membrane                             | MAPKKK cascade; cAMP-mediated signaling                                                |
| RARS      | arginyl-tRNA synthetase                                   | cytoplasm; nucleus; mitochondrion                    | aspartyl-tRNA aminoacylation                                                           |
| RASA2     | RAS p21 protein activator 2                               | cell membrane; cytoplasm                             | intracellular signaling pathway; small GTPase mediated signal transduction             |
| RASA3     | RAS p21 protein activator 3                               | plasma membrane                                      | signal transduction; small GTPase mediated signal transduction                         |
| RBBP7     | retinoblastoma binding protein 7                          | nucleus                                              | DNA replication; transcription; chromatin remodeling; cell growth                      |
| RBM28     | RNA binding motif protein 28                              | nucleus                                              | rRNA processing; RNA splicing                                                          |

|         |                                                                                       |                                                         |                                                                                                |
|---------|---------------------------------------------------------------------------------------|---------------------------------------------------------|------------------------------------------------------------------------------------------------|
| RBM28   | RNA binding motif protein 28                                                          | nucleolus; nucleus                                      | mRNA processing                                                                                |
| RBM39   | RNA binding motif protein 39                                                          | nucleus                                                 | transcription                                                                                  |
| RENBP   | renin binding protein                                                                 | not well defined                                        | regulation of blood pressure; mannose metabolic process; N-acetylglucosamine metabolic process |
| RGS9    | regulator of G-protein signaling 9                                                    | cytoplasm; membrane; nucleus                            | negative regulation of signal transduction                                                     |
| RNPEP   | arginyl aminopeptidase (aminopeptidase B)                                             | extracellular space; plasma membrane                    | proteolysis; leukotriene biosynthetic process                                                  |
| RPLP0   | ribosomal protein, large, P0                                                          | cytoplasm; membrane; nucleus; ribonucleoprotein complex | RNA binding; translation                                                                       |
| RPLP2   | ribosomal protein, large, P2                                                          | cytoplasm; membrane; nucleus; ribonucleoprotein complex | RNA binding; translation                                                                       |
| RPN1    | ribophorin I                                                                          | endoplasmic membrane; melansome                         | protein amino acid glycosylation                                                               |
| RPS6KA2 | ribosomal protein S6 kinase, 90kDa, polypeptide 2                                     | cytoplasm; nucleus                                      | signal transduction; protein amino acid phosphorylation                                        |
| RPS6KA3 | ribosomal protein S6 kinase, 90kDa, polypeptide 3                                     | cytoplasm; nucleus                                      | protein amino acid phosphorylation                                                             |
| RRAS2   | related RAS viral (r-ras) oncogene homolog 2                                          | endoplasmic reticulum; membrane                         | signal transduction; cell migration                                                            |
| RRBP1   | ribosome binding protein 1 homolog 180kDa                                             | ribosome; endoplasmic reticulum; ribosome               | Protein transport; signal transduction; translation; transmembrane transport                   |
| RRP9    | ribosomal RNA processing 9, small subunit (SSU) processome component, homolog (yeast) | nucleus                                                 | rRNA processing                                                                                |
| RTCD1   | RNA terminal phosphate cyclase domain 1                                               | nucleoplasm; nucleus                                    | regulation of mRNA processing; axonogenesis                                                    |
| RTF1    | Rtf1, Paf1/RNA polymerase II complex component, homolog                               | cytoplasm; nucleolus; nucleus                           | transcription                                                                                  |
| RTN4    | reticulon 4                                                                           | cytoplasm; endoplasmic reticulum membrane               | negative regulation of anti-apoptosis; cell differentiation; angiogenesis                      |
| SARNP   | SAP domain containing ribonucleoprotein                                               | nucleus                                                 | regulation of translation                                                                      |

|          |                                                                                                        |                                                                    |                                                                                         |
|----------|--------------------------------------------------------------------------------------------------------|--------------------------------------------------------------------|-----------------------------------------------------------------------------------------|
| SCFD1    | sec1 family domain containing 1                                                                        | cytoplasm; endoplasmic reticulum; Golgi apparatus; plasma membrane | protein transport; post-Golgi vesicle-mediated transport; vesicle mediated transport    |
| SDC2     | syndecan 2                                                                                             | synapse; cell/plasma membrane                                      | wound healing; response to hypoxia                                                      |
| SDPR     | serum deprivation response protein                                                                     | cytoplasm; caveola; membrane                                       | cellular response to starvation                                                         |
| SEC23IP  | SEC23 interacting protein                                                                              | cytoplasm; endoplasmic reticulum                                   | protein transport; Golgi organization                                                   |
| SEC63    | SEC63 homolog                                                                                          | endoplasmic reticulum; cell/plasma membrane                        | protein localization at cell surface; protein transport/localization; protein refolding |
| SEPHS1   | selenophosphate synthetase 1                                                                           | cytoplasm; nucleus                                                 | selenophosphate synthesis                                                               |
| SEPT11   | septin 11                                                                                              | cytoplasm                                                          | cell cycle; protein heterooligomerization; cell division                                |
| SEPT6    | septin 6                                                                                               | cytoplasm                                                          | cell cycle; cytokinesis                                                                 |
| SERPINE1 | serpin peptidase inhibitor, clade E (nexin, plasminogen activator inhibitor type 1), member 1          | cytoplasm; plasma membrane; secreted                               | cell proliferation; Pos. regulation of monocyte chemotaxis                              |
| SERPINF1 | serpin peptidase inhibitor, clade F (alpha-2 antiplasmin, pigment epithelium derived factor), member 1 | secreted, melanosome                                               | cell proliferation; response to retinoic acid; response to glucocorticoid stimulus      |
| SF3A3    | splicing factor 3a, subunit 3, 60kDa                                                                   | nucleus                                                            | mRNA processing                                                                         |
| SF3B1    | splicing factor 3b, subunit 1, 155kDa                                                                  | nucleus                                                            | mRNA processing                                                                         |
| SFRS12   | splicing factor, arginine/serine-rich 12                                                               | nucleus                                                            | RNA splicing; mRNA processing                                                           |
| SFTPD    | surfactant protein D                                                                                   | lysosome; secreted                                                 | innate immune response; macrophage chemotaxis                                           |
| SLC12A3  | solute carrier family 12 (sodium/chloride transporters), member 3                                      | cytoplasm; plasma membrane                                         | sodium ion transport                                                                    |
| SLC16A1  | solute carrier family 16, member 1 (monocarboxylic acid transporter 1)                                 | mitochondrion; plasma membrane                                     | transmembrane transport; mevalonate transport; monocarboxylic acid transport            |
| SLC26A5  | solute carrier family 26, member 5 (prestin)                                                           | membrane                                                           | regulation of cell shape; sensory perception of sound                                   |

|         |                                                                                                   |                                                 |                                                                                                        |
|---------|---------------------------------------------------------------------------------------------------|-------------------------------------------------|--------------------------------------------------------------------------------------------------------|
| SLC39A7 | solute Carrier family 39, member 7                                                                | endoplasmic reticulum membrane; membrane        | ion transport                                                                                          |
| SLITRK2 | SLIT and NTRK-like family, member 2                                                               | cell membrane                                   | potassium ion transport; transmembrane transport; carbohydrate metabolic process                       |
| SLK     | STE20-like kinase                                                                                 | cytoplasm; plasma membrane                      | apoptosis; nucleotide-excision repair; protein amino acid phosphorylation                              |
| SMAD4   | SMAD family member 4                                                                              | cytoplasm; nucleus                              | negative regulation of cell death                                                                      |
| SMARCE1 | SWI/SNF related, matrix associated, actin dependent regulator of chromatin, subfamily e, member 1 | nucleus                                         | chromatin modification; negative regulation of transcription                                           |
| SMC4    | structural maintenance of chromosomes 4                                                           | chromatin; cytoplasm; nucleus                   | cell division; cell cycle                                                                              |
| SMN1    | survival of motor neuron 1, telomeric                                                             | cytoplasm; nucleus                              | mRNA processing                                                                                        |
| SMS     | spermine synthase                                                                                 | cytoplasm                                       | methionine metabolic process; polyamine metabolic process; spermine biosynthetic process               |
| SMYD3   | SET and MYND domain containing 3                                                                  | cytoplasm; nucleus                              | chromatin modification                                                                                 |
| SNRNP70 | small nuclear ribonucleoprotein 70kDa (                                                           | nucleus                                         | RNA splicing; mRNA processing                                                                          |
| SNRPD2  | small nuclear ribonucleoprotein D2 polypeptide 16.5kDa                                            | cytoplasm; nucleus                              | RNA splicing; mRNA processing                                                                          |
| SNRPG   | small nuclear ribonucleoprotein polypeptide G                                                     | cytoplasm; nucleus                              | RNA splicing                                                                                           |
| SNX9    | sorting nexin-9                                                                                   | cytoplasm; microsome; cell/plasma membrane      | cell-cell signaling; protein transport/localization                                                    |
| SON     | SON DNA binding protein                                                                           | nucleus                                         | anti-apoptosis                                                                                         |
| SORBS3  | sorbin and SH3 Domain Containing 3                                                                | cell junction; cytoplasm; cytoskeleton; nucleus | positive regulation of cytoskeleton organization ;positive regulation of MAPKKK cascade; cell adhesion |
| SPARC   | secreted protein, acidic, cysteine-rich                                                           | basement membrane; extracellular matrix         | cellular response to growth factor stimulus; ossification; regulation of cell proliferation            |
| SPAST   | spastin                                                                                           | nucleus; cytoplasm                              | cell cycle; cell differentiation; cell division ; cell death;                                          |

|         |                                                                                |                                                                                        |                                                                                      |
|---------|--------------------------------------------------------------------------------|----------------------------------------------------------------------------------------|--------------------------------------------------------------------------------------|
| SPTBN1  | spectrin, beta, non-erythrocytic 1                                             | cytoplasm; cytoskeleton; membrane; myofibril; nucleus; sarcomere                       | SMAD Protein nuclear translocation; actin filament capping                           |
| SR140   | U2-associated SR140 protein                                                    | undefined                                                                              | RNA splicing                                                                         |
| SRRM1   | serine/arginine repetitive matrix protein 1                                    | nucleus matrix; nucleus speckle                                                        | mRNA processing                                                                      |
| SRSF10  | serine/arginine-rich splicing factor 10                                        | cytoplasm; nucleus                                                                     | RNA splicing, via transesterification reactions; regulation of transcription         |
| SSB     | Sjogren syndrome antigen B (autoantigen La)                                    | cytoplasm; nucleus                                                                     | RNA processing; histone mRNA metabolic process                                       |
| SSU72   | SSU72 RNA polymerase II CTD phosphatase homolog                                | cytoplasm; nucleus                                                                     | phosphatase inhibitor; mRNA processing                                               |
| SSX2IP  | synovial sarcoma, X breakpoint 2 interacting protein                           | cell junction; nucleus                                                                 | cell adhesion                                                                        |
| ST13    | suppression of tumorigenicity 13 (colon carcinoma) (Hsp70 interacting protein) | cytoplasm                                                                              | protein folding                                                                      |
| STARD4  | STAR-related lipid transfer (START) domain containing 4                        | not well defined                                                                       | lipid transport                                                                      |
| STK24   | serine/threonine-protein kinase 24                                             | cytoplasm; nucleosome                                                                  | signal transduction; phosphorylation                                                 |
| STMN1   | stathmin 1                                                                     | cytoplasm                                                                              | cell differentiation; signal transduction; response to virus                         |
| STRN3   | striatin, calmodulin binding protein 3                                         | cytoplasm; gogi apparatus; membrane                                                    | transcription; negative regulation of estrogen receptor signaling pathway            |
| SUB1    | SUB1 homolog (S. cerevisiae)                                                   | nucleus                                                                                | regulation of transcription from RNA polymerase II promoter                          |
| SUCLG1  | succinate-CoA ligase, alpha subunit                                            | mitochondrion                                                                          | acetyl-CoA metabolic process; tricarboxylic acid cycle                               |
| SUPT6H  | suppressor of Ty 6 homolog protein                                             | nucleus                                                                                | nucleobase, nucleoside, nucleotide and nucleic acid metabolic process; transcription |
| SYNCRIP | synaptotagmin binding, cytoplasmic RNA interacting protein                     | cytoplasm; endoplasmic reticulum; microsomes; nucleus                                  | RNA splicing; mRNA processing                                                        |
| SYNPO   | synaptopodin                                                                   | cytoplasm; cytoskeleton; cell junction; dendritic spine; membrane; perikaryon; synapse | positive regulation of actin filament bundle assembly                                |

|        |                                                          |                                                          |                                                                                                           |
|--------|----------------------------------------------------------|----------------------------------------------------------|-----------------------------------------------------------------------------------------------------------|
| TARS   | Threonyl-tRNA synthetase                                 | cytoplasm; mitochondria                                  | threonyl-tRNA aminoacylation; translation                                                                 |
| TAS2R4 | taste receptor, type 2, member 4                         | membrane                                                 | sensory perception of taste; signal transduction                                                          |
| TBC1D1 | TBC1 (tre-2/USP6, BUB2, cdc16) domain family, member 1   | nucleus                                                  | regulation of Rab GTPase activity                                                                         |
| TBP    | TATA box binding protein                                 | cytoplasm; nucleus                                       | spermatogenesis; cell death; RNA elongation; transcription from RNA polymerase III promoter/DNA dependent |
| TBPL1  | TBP-like 1                                               | cytoplasm; Nucleus                                       | regulation of transcription, DNA-dependent; spermatid nucleus differentiation                             |
| TCEA1  | transcription elongation factor A (SII), 1               | nucleus                                                  | RNA elongation; transcription from RNA polymerase II promoter                                             |
| TCERG1 | transcription elongation regulator 1                     | nucleus                                                  | transcription; transcription from RNA polymerase II promoter                                              |
| TCF7L2 | transcription factor 7-like 2 (T-cell specific, HMG-box) | cytoplasm; nucleus                                       | anti-apoptosis; canonical Wnt receptor signaling pathway; cell cycle arrest                               |
| TCOF1  | treacher Collins-Franceschetti syndrome 1                | nucleolus; nucleus                                       | methylation; rRNA transcription                                                                           |
| TCP1   | t-complex 1                                              | cytoplasm                                                | protein folding; tubulin complex assembly                                                                 |
| TDP1   | tyrosyl-DNA phosphodiesterase 1                          | cytoplasm; nucleus                                       | DNA ligation or repair or damage response; induction of cell death                                        |
| TFIP11 | tuftelin interacting protein 11                          | cytoplasm; nucleus                                       | RNA splicing; mRNA processing                                                                             |
| TFRC   | transferrin receptor                                     | cytoplasm; melanosome; endosome; membrane; mitochondrion | response to retinoic acid; response to hypoxia; proteolysis; response to nutrient                         |
| THBS1  | thrombospondin 1                                         | extracellular space; plasma membrane                     | apoptosis; cell adhesion; cell cycle arrest; cell migration; negative regulation of angiogenesis          |
| THOC4  | THO complex 4                                            | cytoplasm; nucleus                                       | RNA splicing; mRNA processing                                                                             |
| THRAP3 | thyroid hormone receptor associated protein 3            | intracellular membrane; mediator complex; nucleus        | androgen receptor signaling pathway; steroid hormone receptor signaling pathway                           |
| TIMM8B | translocase of inner mitochondrial membrane 8 homolog B  | mitochondrion inner membrane; peripheral membrane        | protein targeting to mitochondrion; sensory perception of sound; transmembrane transport                  |



|        |                                                        |                                                                |                                                                                          |
|--------|--------------------------------------------------------|----------------------------------------------------------------|------------------------------------------------------------------------------------------|
| TIMP4  | TIMP metalloproteinase inhibitor 4                     | secreted                                                       | response to cytokine stimulus; response to lipopolysaccharide                            |
| TIPRL  | TIP41, TOR signaling pathway regulator-like            | cytoplasm                                                      | DNA damage checkpoint; negative regulation of protein phosphatase type 2A activity       |
| TJP1   | tight junction protein 1 (zona occludens 1)            | cell junction; membrane; nucleus                               | blastocyst formation; cell-cell junction assembly                                        |
| TLN1   | talin 1                                                | cytoplasm; plasma membrane                                     | cell-cell junction assembly; cytoskeleton organization                                   |
| TLR8   | toll-like receptor 8                                   | membrane                                                       | I-kappaB kinase/NF-kappaB cascade                                                        |
| TLR9   | toll-like receptor 9                                   | cytoplasm; endoplasmic reticulum; endosome; lysosome; membrane | I-kappaB kinase/NF-kappaB cascade (positive and negative); defense response to bacterium |
| TMPO   | thymopoietin                                           | nucleus                                                        | regulation of transcription                                                              |
| TMSB10 | thymosin beta 10                                       | cytoplasm; cytoskeleton                                        | cytoskeleton organization                                                                |
| TNPO1  | transportin 1                                          | cytoplasm; nucleus                                             | protein import into nucleus, translocation                                               |
| TNPO3  | transportin 3                                          | cytoplasm; Nucleus                                             | Protein transport                                                                        |
| TOMM20 | translocase of outer mitochondrial membrane 20 homolog | mitochondrion outer membrane                                   | protein targeting to mitochondrion                                                       |
| TOP1   | topoisomerase (DNA) I                                  | cytoplasm; nucleoplasm; nucleus;                               | DNA replication; DNA topological change; phosphorylation; programmed cell death          |
| TOP2b  | topoisomerase (DNA) II beta                            | nucleolus; nucleus                                             | DNA topological change; chromosome condensation/segregation                              |
| TOPA2  | topoisomerase (DNA) II alpha 170kDa                    | cytoplasm; nucleus                                             | DNA replication; DNA topological change                                                  |
| TP53   | tumor protein p53                                      | cytoplasm; endoplasmic reticulum; mitochondrion; nucleus       | ER overload response; apoptosis; cell cycle arrest; cell differentiation                 |
| TPM1   | tropomyosin 1 (alpha)                                  | cytoplasm; cytoskeleton                                        | cellular component movement; sarcomere organization                                      |
| TPM2   | tropomyosin 2 (beta)                                   | cytoplasm; cytoskeleton                                        | ATPase activity; muscle contraction                                                      |

|          |                                                                    |                                                      |                                                                                             |
|----------|--------------------------------------------------------------------|------------------------------------------------------|---------------------------------------------------------------------------------------------|
| TRAF2IP3 | TRAF3 interacting protein 3                                        | membrane                                             | positive regulation of JNK cascade; cell growth                                             |
| TRIM16   | tripartite motif-containing 16                                     | cytoplasm                                            | histone H3 acetylation; histone H4 acetylation                                              |
| TRIM2    | tripartite motif-containing 2                                      | cytoplasm; early endosome                            | protein transport                                                                           |
| TRIM3    | tripartite motif-containing 3                                      | cytoplasm; early endosome                            | protein transport                                                                           |
| TRNT1    | tRNA nucleotidyl transferase, CCA-adding, 1                        | mitochondrion                                        | RNA processing; protein targeting to mitochondrion; tRNA 3'-end processing                  |
| TRPM6    | transient receptor potential cation channel, subfamily M, member 6 | membrane                                             | calcium homeostasis; magnesium homeostasis/transport                                        |
| TSMF     | Ts translation elongation factor, mitochondrial                    | mitochondrion; nucleus                               | translational elongation                                                                    |
| TTC4     | chaperonin containing TCP1, subunit 6A (zeta 1)                    | cytoplasm                                            | protein folding                                                                             |
| TUBG1    | tubulin, gamma 1                                                   | cytoplasm                                            | meiotic spindle organization                                                                |
| TUBG1    | tubulin, gamma 1                                                   | centrosome; cytoplasm                                | meiotic spindle organization; microtubule cytoskeleton organization; protein polymerization |
| TWF1     | twinfilin, actin-binding protein, homolog 1                        | cytoplasm; cytoskeleton; ruffles                     | protein amino acid phosphorylation                                                          |
| TXLNA    | taxilin alpha                                                      | cytoplasm; extracellular region                      | exocytosis; cell proliferation                                                              |
| TXNDC9   | thioredoxin domain containing 9                                    | centrosome; cytoplasm; midbody; nucleus              | biological process; cell redox homeostasis                                                  |
| TXNRD1   | thioredoxin reductase 1                                            | cytoplasm; mitochondrion; nucleus                    | cell proliferation; cell redox homeostasis; gastrulation                                    |
| TXNRD3   | thioredoxin reductase 3                                            | cytoplasm; endoplasmic reticulum; nucleus; microsome | cell differentiation; cell redox homeostasis; electron transport chain                      |
| UBTF     | upstream binding transcription factor, RNA polymerase I            | nucleus                                              | regulation of transcription; chromatin silencing at rDNA;                                   |
| UCHL1    | ubiquitin carboxyl-terminal esterase L1                            | cytoplasm                                            | protein deubiquitination                                                                    |

|        |                                                                   |                                                                 |                                                                                              |
|--------|-------------------------------------------------------------------|-----------------------------------------------------------------|----------------------------------------------------------------------------------------------|
| UCHL5  | ubiquitin carboxyl-terminal hydrolase L5                          | nucleus; cytoplasm                                              | protein deubiquitination                                                                     |
| UGDH   | UDP-glucose 6-dehydrogenase                                       | cytosol                                                         | oxidation reduction; UDP-glucose metabolic process                                           |
| UPF1   | UPF1 regulator of nonsense transcripts homolog                    | chromatin; cytoplasm; P-body                                    | DNA replication; DNA repair; cell cycle; histone mRNA catabolic process                      |
| UQCRCQ | ubiquinol-cytochrome c reductase, complex III subunit VII, 9.5kDa | mitochondrion/electron transport chain                          | ATP synthesis/electron transport chain                                                       |
| UROD   | uroporphyrinogen decarboxylase                                    | cytoplasm                                                       | heme biosynthetic process; uroporphyrinogen III metabolic process                            |
| USP15  | ubiquitin specific peptidase 15                                   | not well defined                                                | ubiquitin-dependent protein catabolic process; protein deubiquitination                      |
| USP4   | ubiquitin specific peptidase 4 (proto-oncogene)                   | cytoplasm; nucleus                                              | negative regulation of protein ubiquitination; regulation of protein stability               |
| VAMP8  | vesicle-associated membrane protein 8                             | membrane; mitochondrion                                         | vesicle-mediated transport; Cellular Membrane Organization                                   |
| VARS   | valyl-tRNA synthetase                                             | cytoplasm; mitochondrion                                        | valyl-tRNA aminoacylation; translational elongation                                          |
| VAT1   | vesicle amine transport protein 1 homolog                         | cytoplasm                                                       | oxidation reduction                                                                          |
| VCAM1  | vascular cell adhesion molecule 1                                 | cell membrane; plasma membrane; extracellular space             | response to nutrient; response to hypoxia                                                    |
| VCAN   | versican                                                          | extracellular space/matrix                                      | angiogenesis; cell adhesion; cell proliferation; cell migration/cell-cell migration/collagen |
| VCL    | vinculin                                                          | cell junction; cytoplasm; membrane; actin                       | cell adhesion                                                                                |
| VCP    | valosin-containing protein                                        | cytoplasm; nucleus                                              | protein ubiquitination                                                                       |
| VIM    | vimentin                                                          | axon; cytoskeleton; colocalizes with plasma membrane; cytoplasm | intermediate filament-based process                                                          |
| VPS25  | vacuolar protein sorting 25 homolog                               | cytoplasm; endocytic vesicle/endosome; membrane; nucleus;       | transcription; transport                                                                     |
| VPS35  | vacuolar protein sorting 35 homolog                               | cytoplasm; membrane                                             | protein transport; retrograde transport, endosome to Golgi                                   |

|       |                                                                        |                                                                                                            |                                                                                                           |
|-------|------------------------------------------------------------------------|------------------------------------------------------------------------------------------------------------|-----------------------------------------------------------------------------------------------------------|
| VPS45 | vacuolar protein sorting 45 homolog                                    | golgi apparatus membrane; peripheral membrane protein                                                      | vesicle docking involved in exocytosis; vesicle mediated transport                                        |
| VT11A | vesicle transport through interaction with t-SNAREs homolog 1A         | golgi apparatus membrane; Single-pass type IV membrane protein. Mainly associated with the Golgi apparatus | vesicle-mediated transport; protein transport; retrograde transport, endosome to Golgi                    |
| XDH   | xanthine dehydrogenase                                                 | peroxisome; cytoplasm                                                                                      | lactation; oxidation reduction; regulation of epithelial cell differentiation; xanthine catabolic process |
| XPO5  | exportin-5                                                             | cytoplasm; nucleus                                                                                         | gene silencing by RNA; protein transport                                                                  |
| XRCC1 | X-ray repair complementing defective repair in Chinese hamster cells 1 | nucleus                                                                                                    | response to hypoxia; single strand break repair                                                           |
| YAP1  | yes-associated protein 1                                               | nucleus; cytoplasm                                                                                         | cell proliferation; hippo signaling cascade; regulation of transcription                                  |
| YARS  | tyrosyl-tRNA synthetase                                                | cytoplasm; nucleus                                                                                         | tyrosyl-tRNA aminoacylation; apoptosis                                                                    |
| ZFH3  | zinc finger homeobox 3                                                 | mitochondrion; nucleus                                                                                     | positive or negative regulation of myoblast differentiation                                               |
| ZFR   | zinc finger RNA binding protein                                        | chromosome; cytoplasm; nucleoplasm                                                                         | DNA binding; poly(a) RNA binding protein binding; zinc ion binding                                        |
| ZMAT3 | zinc finger matrix type 3                                              | nuclear matrix, nucleolus                                                                                  | cell growth (negative); protein transport; response to DNA damage                                         |
